# Supplementary material
Source: PubMed Central journal article supplement (PMC8318686)
Supplement: mmc1.pdf [file mmc1.pdf]

## COVID-19 SURVEY

PID 7859

Codebook ▾

## Data Dictionary Codebook

03/25/2021 4:46pm

[^ Collapse all instruments](#)

| #                                                                                                                                  | Variable / Field Name                                                              | Field Label<br><i>Field Note</i>                         | Field Attributes (Field Type, Validation, Choices, Calculations, etc.)                                                                                     |   |            |   |            |   |          |
|------------------------------------------------------------------------------------------------------------------------------------|------------------------------------------------------------------------------------|----------------------------------------------------------|------------------------------------------------------------------------------------------------------------------------------------------------------------|---|------------|---|------------|---|----------|
| Instrument: <b>Summary Explanation of Research</b> (summary_explanation_of_research)  Enabled as survey <a href="#">^ Collapse</a> |                                                                                    |                                                          |                                                                                                                                                            |   |            |   |            |   |          |
| 1                                                                                                                                  | participant_id                                                                     | Participant ID                                           | text                                                                                                                                                       |   |            |   |            |   |          |
| 2                                                                                                                                  | consent                                                                            | Do you want to complete the survey ?                     | yesno<br><table border="1"> <tr><td>1</td><td>Yes</td></tr> <tr><td>0</td><td>No</td></tr> </table><br>Stop actions on 0                                   | 1 | Yes        | 0 | No         |   |          |
| 1                                                                                                                                  | Yes                                                                                |                                                          |                                                                                                                                                            |   |            |   |            |   |          |
| 0                                                                                                                                  | No                                                                                 |                                                          |                                                                                                                                                            |   |            |   |            |   |          |
| 3                                                                                                                                  | age_limit                                                                          | Are you 18 years old or above?                           | yesno<br><table border="1"> <tr><td>1</td><td>Yes</td></tr> <tr><td>0</td><td>No</td></tr> </table><br>Stop actions on 0                                   | 1 | Yes        | 0 | No         |   |          |
| 1                                                                                                                                  | Yes                                                                                |                                                          |                                                                                                                                                            |   |            |   |            |   |          |
| 0                                                                                                                                  | No                                                                                 |                                                          |                                                                                                                                                            |   |            |   |            |   |          |
| 4                                                                                                                                  | exclusion_eu                                                                       | Are you from Europe or European Union (EU)?              | yesno<br><table border="1"> <tr><td>1</td><td>Yes</td></tr> <tr><td>0</td><td>No</td></tr> </table><br>Stop actions on 1                                   | 1 | Yes        | 0 | No         |   |          |
| 1                                                                                                                                  | Yes                                                                                |                                                          |                                                                                                                                                            |   |            |   |            |   |          |
| 0                                                                                                                                  | No                                                                                 |                                                          |                                                                                                                                                            |   |            |   |            |   |          |
| 5                                                                                                                                  | summary_explanation_of_research_complete                                           | Section Header: <i>Form Status</i><br>Complete?          | dropdown<br><table border="1"> <tr><td>0</td><td>Incomplete</td></tr> <tr><td>1</td><td>Unverified</td></tr> <tr><td>2</td><td>Complete</td></tr> </table> | 0 | Incomplete | 1 | Unverified | 2 | Complete |
| 0                                                                                                                                  | Incomplete                                                                         |                                                          |                                                                                                                                                            |   |            |   |            |   |          |
| 1                                                                                                                                  | Unverified                                                                         |                                                          |                                                                                                                                                            |   |            |   |            |   |          |
| 2                                                                                                                                  | Complete                                                                           |                                                          |                                                                                                                                                            |   |            |   |            |   |          |
| Instrument: <b>Concern about COVID-19</b> (concern_about_covid19)  Enabled as survey <a href="#">^ Collapse</a>                    |                                                                                    |                                                          |                                                                                                                                                            |   |            |   |            |   |          |
| 6                                                                                                                                  | healthcare_worker                                                                  | Are you a healthcare worker ?                            | yesno<br><table border="1"> <tr><td>1</td><td>Yes</td></tr> <tr><td>0</td><td>No</td></tr> </table>                                                        | 1 | Yes        | 0 | No         |   |          |
| 1                                                                                                                                  | Yes                                                                                |                                                          |                                                                                                                                                            |   |            |   |            |   |          |
| 0                                                                                                                                  | No                                                                                 |                                                          |                                                                                                                                                            |   |            |   |            |   |          |
| 7                                                                                                                                  | family_member_covid                                                                | You or your family member had symptoms like COVID-19:    | yesno<br><table border="1"> <tr><td>1</td><td>Yes</td></tr> <tr><td>0</td><td>No</td></tr> </table><br>Custom alignment: LV                                | 1 | Yes        | 0 | No         |   |          |
| 1                                                                                                                                  | Yes                                                                                |                                                          |                                                                                                                                                            |   |            |   |            |   |          |
| 0                                                                                                                                  | No                                                                                 |                                                          |                                                                                                                                                            |   |            |   |            |   |          |
| 8                                                                                                                                  | family_member_covid_test<br>Show the field ONLY if:<br>[family_member_covid] = '1' | You or your family member were tested for COVID-19 :     | yesno<br><table border="1"> <tr><td>1</td><td>Yes</td></tr> <tr><td>0</td><td>No</td></tr> </table><br>Custom alignment: LV                                | 1 | Yes        | 0 | No         |   |          |
| 1                                                                                                                                  | Yes                                                                                |                                                          |                                                                                                                                                            |   |            |   |            |   |          |
| 0                                                                                                                                  | No                                                                                 |                                                          |                                                                                                                                                            |   |            |   |            |   |          |
| 9                                                                                                                                  | fam_mem_covid_dx<br>Show the field ONLY if:<br>[family_member_covid_test] = '1'    | You or your family member were diagnosed with COVID-19 : | yesno<br><table border="1"> <tr><td>1</td><td>Yes</td></tr> <tr><td>0</td><td>No</td></tr> </table><br>Custom alignment: LV                                | 1 | Yes        | 0 | No         |   |          |
| 1                                                                                                                                  | Yes                                                                                |                                                          |                                                                                                                                                            |   |            |   |            |   |          |
| 0                                                                                                                                  | No                                                                                 |                                                          |                                                                                                                                                            |   |            |   |            |   |          |

|    |                                                                                  |                                                                                                                         |                                                                                                                                                                                                                                                                                                                                                                                                                                                                                                                                                                                                                                                                                                                                                                                                                                                                                                                                                                                                                                                                     |   |                             |                         |                  |                             |                     |   |                             |                                         |                      |                             |                                          |   |                             |          |            |                             |          |   |                             |                                       |   |                             |                          |   |                             |                               |    |                              |                    |
|----|----------------------------------------------------------------------------------|-------------------------------------------------------------------------------------------------------------------------|---------------------------------------------------------------------------------------------------------------------------------------------------------------------------------------------------------------------------------------------------------------------------------------------------------------------------------------------------------------------------------------------------------------------------------------------------------------------------------------------------------------------------------------------------------------------------------------------------------------------------------------------------------------------------------------------------------------------------------------------------------------------------------------------------------------------------------------------------------------------------------------------------------------------------------------------------------------------------------------------------------------------------------------------------------------------|---|-----------------------------|-------------------------|------------------|-----------------------------|---------------------|---|-----------------------------|-----------------------------------------|----------------------|-----------------------------|------------------------------------------|---|-----------------------------|----------|------------|-----------------------------|----------|---|-----------------------------|---------------------------------------|---|-----------------------------|--------------------------|---|-----------------------------|-------------------------------|----|------------------------------|--------------------|
| 10 | fm_mem_covid_hospitalized<br>Show the field ONLY if:<br>[fam_mem_covid_dx] = '1' | You or your family member were hospitalized with COVID-19 :                                                             | yesno<br><table border="1" data-bbox="1042 111 1117 191"> <tr> <td>1</td> <td>Yes</td> </tr> <tr> <td>0</td> <td>No</td> </tr> </table> Custom alignment: LV                                                                                                                                                                                                                                                                                                                                                                                                                                                                                                                                                                                                                                                                                                                                                                                                                                                                                                        | 1 | Yes                         | 0                       | No               |                             |                     |   |                             |                                         |                      |                             |                                          |   |                             |          |            |                             |          |   |                             |                                       |   |                             |                          |   |                             |                               |    |                              |                    |
| 1  | Yes                                                                              |                                                                                                                         |                                                                                                                                                                                                                                                                                                                                                                                                                                                                                                                                                                                                                                                                                                                                                                                                                                                                                                                                                                                                                                                                     |   |                             |                         |                  |                             |                     |   |                             |                                         |                      |                             |                                          |   |                             |          |            |                             |          |   |                             |                                       |   |                             |                          |   |                             |                               |    |                              |                    |
| 0  | No                                                                               |                                                                                                                         |                                                                                                                                                                                                                                                                                                                                                                                                                                                                                                                                                                                                                                                                                                                                                                                                                                                                                                                                                                                                                                                                     |   |                             |                         |                  |                             |                     |   |                             |                                         |                      |                             |                                          |   |                             |          |            |                             |          |   |                             |                                       |   |                             |                          |   |                             |                               |    |                              |                    |
| 11 | covid_follow                                                                     | When did you start following COVID-19 actively ?                                                                        | radio<br><table border="1" data-bbox="1042 285 1279 606"> <tr> <td>1</td> <td>December 2019</td> </tr> <tr> <td>2</td> <td>Mid-January 2020</td> </tr> <tr> <td>3</td> <td>End of January 2020</td> </tr> <tr> <td>4</td> <td>Mid-February 2020</td> </tr> <tr> <td>5</td> <td>End of February 2020</td> </tr> <tr> <td>6</td> <td>Mid-March 2020</td> </tr> <tr> <td>7</td> <td>End of March 2020</td> </tr> <tr> <td>8</td> <td>April 2020</td> </tr> </table> Custom alignment: LH                                                                                                                                                                                                                                                                                                                                                                                                                                                                                                                                                                               | 1 | December 2019               | 2                       | Mid-January 2020 | 3                           | End of January 2020 | 4 | Mid-February 2020           | 5                                       | End of February 2020 | 6                           | Mid-March 2020                           | 7 | End of March 2020           | 8        | April 2020 |                             |          |   |                             |                                       |   |                             |                          |   |                             |                               |    |                              |                    |
| 1  | December 2019                                                                    |                                                                                                                         |                                                                                                                                                                                                                                                                                                                                                                                                                                                                                                                                                                                                                                                                                                                                                                                                                                                                                                                                                                                                                                                                     |   |                             |                         |                  |                             |                     |   |                             |                                         |                      |                             |                                          |   |                             |          |            |                             |          |   |                             |                                       |   |                             |                          |   |                             |                               |    |                              |                    |
| 2  | Mid-January 2020                                                                 |                                                                                                                         |                                                                                                                                                                                                                                                                                                                                                                                                                                                                                                                                                                                                                                                                                                                                                                                                                                                                                                                                                                                                                                                                     |   |                             |                         |                  |                             |                     |   |                             |                                         |                      |                             |                                          |   |                             |          |            |                             |          |   |                             |                                       |   |                             |                          |   |                             |                               |    |                              |                    |
| 3  | End of January 2020                                                              |                                                                                                                         |                                                                                                                                                                                                                                                                                                                                                                                                                                                                                                                                                                                                                                                                                                                                                                                                                                                                                                                                                                                                                                                                     |   |                             |                         |                  |                             |                     |   |                             |                                         |                      |                             |                                          |   |                             |          |            |                             |          |   |                             |                                       |   |                             |                          |   |                             |                               |    |                              |                    |
| 4  | Mid-February 2020                                                                |                                                                                                                         |                                                                                                                                                                                                                                                                                                                                                                                                                                                                                                                                                                                                                                                                                                                                                                                                                                                                                                                                                                                                                                                                     |   |                             |                         |                  |                             |                     |   |                             |                                         |                      |                             |                                          |   |                             |          |            |                             |          |   |                             |                                       |   |                             |                          |   |                             |                               |    |                              |                    |
| 5  | End of February 2020                                                             |                                                                                                                         |                                                                                                                                                                                                                                                                                                                                                                                                                                                                                                                                                                                                                                                                                                                                                                                                                                                                                                                                                                                                                                                                     |   |                             |                         |                  |                             |                     |   |                             |                                         |                      |                             |                                          |   |                             |          |            |                             |          |   |                             |                                       |   |                             |                          |   |                             |                               |    |                              |                    |
| 6  | Mid-March 2020                                                                   |                                                                                                                         |                                                                                                                                                                                                                                                                                                                                                                                                                                                                                                                                                                                                                                                                                                                                                                                                                                                                                                                                                                                                                                                                     |   |                             |                         |                  |                             |                     |   |                             |                                         |                      |                             |                                          |   |                             |          |            |                             |          |   |                             |                                       |   |                             |                          |   |                             |                               |    |                              |                    |
| 7  | End of March 2020                                                                |                                                                                                                         |                                                                                                                                                                                                                                                                                                                                                                                                                                                                                                                                                                                                                                                                                                                                                                                                                                                                                                                                                                                                                                                                     |   |                             |                         |                  |                             |                     |   |                             |                                         |                      |                             |                                          |   |                             |          |            |                             |          |   |                             |                                       |   |                             |                          |   |                             |                               |    |                              |                    |
| 8  | April 2020                                                                       |                                                                                                                         |                                                                                                                                                                                                                                                                                                                                                                                                                                                                                                                                                                                                                                                                                                                                                                                                                                                                                                                                                                                                                                                                     |   |                             |                         |                  |                             |                     |   |                             |                                         |                      |                             |                                          |   |                             |          |            |                             |          |   |                             |                                       |   |                             |                          |   |                             |                               |    |                              |                    |
| 12 | covid_information_source                                                         | Which sources do you follow for COVID-19 updates ? (CHECK ALL THAT APPLY)                                               | checkbox<br><table border="1" data-bbox="1042 699 1523 1476"> <tr> <td>1</td> <td>covid_information_source__1</td> <td>Television news channel</td> </tr> <tr> <td>2</td> <td>covid_information_source__2</td> <td>Friends and family</td> </tr> <tr> <td>3</td> <td>covid_information_source__3</td> <td>World health organization (WHO) website</td> </tr> <tr> <td>4</td> <td>covid_information_source__4</td> <td>CDC (center for disease control) website</td> </tr> <tr> <td>5</td> <td>covid_information_source__5</td> <td>Facebook</td> </tr> <tr> <td>6</td> <td>covid_information_source__6</td> <td>WhatsApp</td> </tr> <tr> <td>7</td> <td>covid_information_source__7</td> <td>City, state or other official website</td> </tr> <tr> <td>8</td> <td>covid_information_source__8</td> <td>National health websites</td> </tr> <tr> <td>9</td> <td>covid_information_source__9</td> <td>Your doctor or local hospital</td> </tr> <tr> <td>10</td> <td>covid_information_source__10</td> <td>Scientific journal</td> </tr> </table> Custom alignment: LV | 1 | covid_information_source__1 | Television news channel | 2                | covid_information_source__2 | Friends and family  | 3 | covid_information_source__3 | World health organization (WHO) website | 4                    | covid_information_source__4 | CDC (center for disease control) website | 5 | covid_information_source__5 | Facebook | 6          | covid_information_source__6 | WhatsApp | 7 | covid_information_source__7 | City, state or other official website | 8 | covid_information_source__8 | National health websites | 9 | covid_information_source__9 | Your doctor or local hospital | 10 | covid_information_source__10 | Scientific journal |
| 1  | covid_information_source__1                                                      | Television news channel                                                                                                 |                                                                                                                                                                                                                                                                                                                                                                                                                                                                                                                                                                                                                                                                                                                                                                                                                                                                                                                                                                                                                                                                     |   |                             |                         |                  |                             |                     |   |                             |                                         |                      |                             |                                          |   |                             |          |            |                             |          |   |                             |                                       |   |                             |                          |   |                             |                               |    |                              |                    |
| 2  | covid_information_source__2                                                      | Friends and family                                                                                                      |                                                                                                                                                                                                                                                                                                                                                                                                                                                                                                                                                                                                                                                                                                                                                                                                                                                                                                                                                                                                                                                                     |   |                             |                         |                  |                             |                     |   |                             |                                         |                      |                             |                                          |   |                             |          |            |                             |          |   |                             |                                       |   |                             |                          |   |                             |                               |    |                              |                    |
| 3  | covid_information_source__3                                                      | World health organization (WHO) website                                                                                 |                                                                                                                                                                                                                                                                                                                                                                                                                                                                                                                                                                                                                                                                                                                                                                                                                                                                                                                                                                                                                                                                     |   |                             |                         |                  |                             |                     |   |                             |                                         |                      |                             |                                          |   |                             |          |            |                             |          |   |                             |                                       |   |                             |                          |   |                             |                               |    |                              |                    |
| 4  | covid_information_source__4                                                      | CDC (center for disease control) website                                                                                |                                                                                                                                                                                                                                                                                                                                                                                                                                                                                                                                                                                                                                                                                                                                                                                                                                                                                                                                                                                                                                                                     |   |                             |                         |                  |                             |                     |   |                             |                                         |                      |                             |                                          |   |                             |          |            |                             |          |   |                             |                                       |   |                             |                          |   |                             |                               |    |                              |                    |
| 5  | covid_information_source__5                                                      | Facebook                                                                                                                |                                                                                                                                                                                                                                                                                                                                                                                                                                                                                                                                                                                                                                                                                                                                                                                                                                                                                                                                                                                                                                                                     |   |                             |                         |                  |                             |                     |   |                             |                                         |                      |                             |                                          |   |                             |          |            |                             |          |   |                             |                                       |   |                             |                          |   |                             |                               |    |                              |                    |
| 6  | covid_information_source__6                                                      | WhatsApp                                                                                                                |                                                                                                                                                                                                                                                                                                                                                                                                                                                                                                                                                                                                                                                                                                                                                                                                                                                                                                                                                                                                                                                                     |   |                             |                         |                  |                             |                     |   |                             |                                         |                      |                             |                                          |   |                             |          |            |                             |          |   |                             |                                       |   |                             |                          |   |                             |                               |    |                              |                    |
| 7  | covid_information_source__7                                                      | City, state or other official website                                                                                   |                                                                                                                                                                                                                                                                                                                                                                                                                                                                                                                                                                                                                                                                                                                                                                                                                                                                                                                                                                                                                                                                     |   |                             |                         |                  |                             |                     |   |                             |                                         |                      |                             |                                          |   |                             |          |            |                             |          |   |                             |                                       |   |                             |                          |   |                             |                               |    |                              |                    |
| 8  | covid_information_source__8                                                      | National health websites                                                                                                |                                                                                                                                                                                                                                                                                                                                                                                                                                                                                                                                                                                                                                                                                                                                                                                                                                                                                                                                                                                                                                                                     |   |                             |                         |                  |                             |                     |   |                             |                                         |                      |                             |                                          |   |                             |          |            |                             |          |   |                             |                                       |   |                             |                          |   |                             |                               |    |                              |                    |
| 9  | covid_information_source__9                                                      | Your doctor or local hospital                                                                                           |                                                                                                                                                                                                                                                                                                                                                                                                                                                                                                                                                                                                                                                                                                                                                                                                                                                                                                                                                                                                                                                                     |   |                             |                         |                  |                             |                     |   |                             |                                         |                      |                             |                                          |   |                             |          |            |                             |          |   |                             |                                       |   |                             |                          |   |                             |                               |    |                              |                    |
| 10 | covid_information_source__10                                                     | Scientific journal                                                                                                      |                                                                                                                                                                                                                                                                                                                                                                                                                                                                                                                                                                                                                                                                                                                                                                                                                                                                                                                                                                                                                                                                     |   |                             |                         |                  |                             |                     |   |                             |                                         |                      |                             |                                          |   |                             |          |            |                             |          |   |                             |                                       |   |                             |                          |   |                             |                               |    |                              |                    |
| 13 | confine                                                                          | Section Header: <i>Stress Related to COVID-19 Pandemic</i><br>Being confined at home with minimal social interaction is | radio (Matrix)<br><table border="1" data-bbox="1042 1568 1269 1770"> <tr> <td>1</td> <td>Very stressful</td> </tr> <tr> <td>2</td> <td>Stressful</td> </tr> <tr> <td>3</td> <td>Sometimes stressful</td> </tr> <tr> <td>4</td> <td>Mostly handled well</td> </tr> <tr> <td>5</td> <td>Not stressful at all</td> </tr> </table> Field Annotation: confine                                                                                                                                                                                                                                                                                                                                                                                                                                                                                                                                                                                                                                                                                                            | 1 | Very stressful              | 2                       | Stressful        | 3                           | Sometimes stressful | 4 | Mostly handled well         | 5                                       | Not stressful at all |                             |                                          |   |                             |          |            |                             |          |   |                             |                                       |   |                             |                          |   |                             |                               |    |                              |                    |
| 1  | Very stressful                                                                   |                                                                                                                         |                                                                                                                                                                                                                                                                                                                                                                                                                                                                                                                                                                                                                                                                                                                                                                                                                                                                                                                                                                                                                                                                     |   |                             |                         |                  |                             |                     |   |                             |                                         |                      |                             |                                          |   |                             |          |            |                             |          |   |                             |                                       |   |                             |                          |   |                             |                               |    |                              |                    |
| 2  | Stressful                                                                        |                                                                                                                         |                                                                                                                                                                                                                                                                                                                                                                                                                                                                                                                                                                                                                                                                                                                                                                                                                                                                                                                                                                                                                                                                     |   |                             |                         |                  |                             |                     |   |                             |                                         |                      |                             |                                          |   |                             |          |            |                             |          |   |                             |                                       |   |                             |                          |   |                             |                               |    |                              |                    |
| 3  | Sometimes stressful                                                              |                                                                                                                         |                                                                                                                                                                                                                                                                                                                                                                                                                                                                                                                                                                                                                                                                                                                                                                                                                                                                                                                                                                                                                                                                     |   |                             |                         |                  |                             |                     |   |                             |                                         |                      |                             |                                          |   |                             |          |            |                             |          |   |                             |                                       |   |                             |                          |   |                             |                               |    |                              |                    |
| 4  | Mostly handled well                                                              |                                                                                                                         |                                                                                                                                                                                                                                                                                                                                                                                                                                                                                                                                                                                                                                                                                                                                                                                                                                                                                                                                                                                                                                                                     |   |                             |                         |                  |                             |                     |   |                             |                                         |                      |                             |                                          |   |                             |          |            |                             |          |   |                             |                                       |   |                             |                          |   |                             |                               |    |                              |                    |
| 5  | Not stressful at all                                                             |                                                                                                                         |                                                                                                                                                                                                                                                                                                                                                                                                                                                                                                                                                                                                                                                                                                                                                                                                                                                                                                                                                                                                                                                                     |   |                             |                         |                  |                             |                     |   |                             |                                         |                      |                             |                                          |   |                             |          |            |                             |          |   |                             |                                       |   |                             |                          |   |                             |                               |    |                              |                    |

|    |                      |                                                                               |                                                                                                                                                                                                                                                                                                                                                |   |                |   |           |   |                     |   |                     |   |                      |
|----|----------------------|-------------------------------------------------------------------------------|------------------------------------------------------------------------------------------------------------------------------------------------------------------------------------------------------------------------------------------------------------------------------------------------------------------------------------------------|---|----------------|---|-----------|---|---------------------|---|---------------------|---|----------------------|
| 14 | job                  | Job situation or possibility of financial instability is                      | radio (Matrix) <table border="1" data-bbox="1044 111 1271 312"> <tr><td>1</td><td>Very stressful</td></tr> <tr><td>2</td><td>Stressful</td></tr> <tr><td>3</td><td>Sometimes stressful</td></tr> <tr><td>4</td><td>Mostly handled well</td></tr> <tr><td>5</td><td>Not stressful at all</td></tr> </table> Field Annotation: job               | 1 | Very stressful | 2 | Stressful | 3 | Sometimes stressful | 4 | Mostly handled well | 5 | Not stressful at all |
| 1  | Very stressful       |                                                                               |                                                                                                                                                                                                                                                                                                                                                |   |                |   |           |   |                     |   |                     |   |                      |
| 2  | Stressful            |                                                                               |                                                                                                                                                                                                                                                                                                                                                |   |                |   |           |   |                     |   |                     |   |                      |
| 3  | Sometimes stressful  |                                                                               |                                                                                                                                                                                                                                                                                                                                                |   |                |   |           |   |                     |   |                     |   |                      |
| 4  | Mostly handled well  |                                                                               |                                                                                                                                                                                                                                                                                                                                                |   |                |   |           |   |                     |   |                     |   |                      |
| 5  | Not stressful at all |                                                                               |                                                                                                                                                                                                                                                                                                                                                |   |                |   |           |   |                     |   |                     |   |                      |
| 15 | infection            | The possibility of getting infected with COVID-19 is                          | radio (Matrix) <table border="1" data-bbox="1044 403 1271 604"> <tr><td>1</td><td>Very stressful</td></tr> <tr><td>2</td><td>Stressful</td></tr> <tr><td>3</td><td>Sometimes stressful</td></tr> <tr><td>4</td><td>Mostly handled well</td></tr> <tr><td>5</td><td>Not stressful at all</td></tr> </table> Field Annotation: infection         | 1 | Very stressful | 2 | Stressful | 3 | Sometimes stressful | 4 | Mostly handled well | 5 | Not stressful at all |
| 1  | Very stressful       |                                                                               |                                                                                                                                                                                                                                                                                                                                                |   |                |   |           |   |                     |   |                     |   |                      |
| 2  | Stressful            |                                                                               |                                                                                                                                                                                                                                                                                                                                                |   |                |   |           |   |                     |   |                     |   |                      |
| 3  | Sometimes stressful  |                                                                               |                                                                                                                                                                                                                                                                                                                                                |   |                |   |           |   |                     |   |                     |   |                      |
| 4  | Mostly handled well  |                                                                               |                                                                                                                                                                                                                                                                                                                                                |   |                |   |           |   |                     |   |                     |   |                      |
| 5  | Not stressful at all |                                                                               |                                                                                                                                                                                                                                                                                                                                                |   |                |   |           |   |                     |   |                     |   |                      |
| 16 | food                 | Possible shortage of food and other essentials in the coming months           | radio (Matrix) <table border="1" data-bbox="1044 699 1271 900"> <tr><td>1</td><td>Very stressful</td></tr> <tr><td>2</td><td>Stressful</td></tr> <tr><td>3</td><td>Sometimes stressful</td></tr> <tr><td>4</td><td>Mostly handled well</td></tr> <tr><td>5</td><td>Not stressful at all</td></tr> </table> Field Annotation: food              | 1 | Very stressful | 2 | Stressful | 3 | Sometimes stressful | 4 | Mostly handled well | 5 | Not stressful at all |
| 1  | Very stressful       |                                                                               |                                                                                                                                                                                                                                                                                                                                                |   |                |   |           |   |                     |   |                     |   |                      |
| 2  | Stressful            |                                                                               |                                                                                                                                                                                                                                                                                                                                                |   |                |   |           |   |                     |   |                     |   |                      |
| 3  | Sometimes stressful  |                                                                               |                                                                                                                                                                                                                                                                                                                                                |   |                |   |           |   |                     |   |                     |   |                      |
| 4  | Mostly handled well  |                                                                               |                                                                                                                                                                                                                                                                                                                                                |   |                |   |           |   |                     |   |                     |   |                      |
| 5  | Not stressful at all |                                                                               |                                                                                                                                                                                                                                                                                                                                                |   |                |   |           |   |                     |   |                     |   |                      |
| 17 | death                | One of your family members is at risk of serious complication due to COVID-19 | radio (Matrix) <table border="1" data-bbox="1044 995 1271 1197"> <tr><td>1</td><td>Very stressful</td></tr> <tr><td>2</td><td>Stressful</td></tr> <tr><td>3</td><td>Sometimes stressful</td></tr> <tr><td>4</td><td>Mostly handled well</td></tr> <tr><td>5</td><td>Not stressful at all</td></tr> </table> Field Annotation: death            | 1 | Very stressful | 2 | Stressful | 3 | Sometimes stressful | 4 | Mostly handled well | 5 | Not stressful at all |
| 1  | Very stressful       |                                                                               |                                                                                                                                                                                                                                                                                                                                                |   |                |   |           |   |                     |   |                     |   |                      |
| 2  | Stressful            |                                                                               |                                                                                                                                                                                                                                                                                                                                                |   |                |   |           |   |                     |   |                     |   |                      |
| 3  | Sometimes stressful  |                                                                               |                                                                                                                                                                                                                                                                                                                                                |   |                |   |           |   |                     |   |                     |   |                      |
| 4  | Mostly handled well  |                                                                               |                                                                                                                                                                                                                                                                                                                                                |   |                |   |           |   |                     |   |                     |   |                      |
| 5  | Not stressful at all |                                                                               |                                                                                                                                                                                                                                                                                                                                                |   |                |   |           |   |                     |   |                     |   |                      |
| 18 | hospital_access      | Lack of access to a good medical facility                                     | radio (Matrix) <table border="1" data-bbox="1044 1291 1271 1493"> <tr><td>1</td><td>Very stressful</td></tr> <tr><td>2</td><td>Stressful</td></tr> <tr><td>3</td><td>Sometimes stressful</td></tr> <tr><td>4</td><td>Mostly handled well</td></tr> <tr><td>5</td><td>Not stressful at all</td></tr> </table> Field Annotation: hospital_access | 1 | Very stressful | 2 | Stressful | 3 | Sometimes stressful | 4 | Mostly handled well | 5 | Not stressful at all |
| 1  | Very stressful       |                                                                               |                                                                                                                                                                                                                                                                                                                                                |   |                |   |           |   |                     |   |                     |   |                      |
| 2  | Stressful            |                                                                               |                                                                                                                                                                                                                                                                                                                                                |   |                |   |           |   |                     |   |                     |   |                      |
| 3  | Sometimes stressful  |                                                                               |                                                                                                                                                                                                                                                                                                                                                |   |                |   |           |   |                     |   |                     |   |                      |
| 4  | Mostly handled well  |                                                                               |                                                                                                                                                                                                                                                                                                                                                |   |                |   |           |   |                     |   |                     |   |                      |
| 5  | Not stressful at all |                                                                               |                                                                                                                                                                                                                                                                                                                                                |   |                |   |           |   |                     |   |                     |   |                      |
| 19 | covid_state          | Situation of COVID-19 at your state                                           | radio (Matrix) <table border="1" data-bbox="1044 1587 1271 1789"> <tr><td>1</td><td>Very stressful</td></tr> <tr><td>2</td><td>Stressful</td></tr> <tr><td>3</td><td>Sometimes stressful</td></tr> <tr><td>4</td><td>Mostly handled well</td></tr> <tr><td>5</td><td>Not stressful at all</td></tr> </table> Field Annotation: COVID_state     | 1 | Very stressful | 2 | Stressful | 3 | Sometimes stressful | 4 | Mostly handled well | 5 | Not stressful at all |
| 1  | Very stressful       |                                                                               |                                                                                                                                                                                                                                                                                                                                                |   |                |   |           |   |                     |   |                     |   |                      |
| 2  | Stressful            |                                                                               |                                                                                                                                                                                                                                                                                                                                                |   |                |   |           |   |                     |   |                     |   |                      |
| 3  | Sometimes stressful  |                                                                               |                                                                                                                                                                                                                                                                                                                                                |   |                |   |           |   |                     |   |                     |   |                      |
| 4  | Mostly handled well  |                                                                               |                                                                                                                                                                                                                                                                                                                                                |   |                |   |           |   |                     |   |                     |   |                      |
| 5  | Not stressful at all |                                                                               |                                                                                                                                                                                                                                                                                                                                                |   |                |   |           |   |                     |   |                     |   |                      |

|    |                   |                                                                                           |                                                                                                                                                                                                                                                                                          |   |                |   |       |   |         |   |          |   |                   |
|----|-------------------|-------------------------------------------------------------------------------------------|------------------------------------------------------------------------------------------------------------------------------------------------------------------------------------------------------------------------------------------------------------------------------------------|---|----------------|---|-------|---|---------|---|----------|---|-------------------|
| 20 | sd                | <p>Section Header: <i>Prevention of Disease Spread</i></p> <p>Social distancing helps</p> | <p>radio (Matrix)</p> <table border="1"> <tr><td>1</td><td>Strongly agree</td></tr> <tr><td>2</td><td>Agree</td></tr> <tr><td>3</td><td>Neutral</td></tr> <tr><td>4</td><td>Disagree</td></tr> <tr><td>5</td><td>Strongly disagree</td></tr> </table> <p>Field Annotation: SD</p>        | 1 | Strongly agree | 2 | Agree | 3 | Neutral | 4 | Disagree | 5 | Strongly disagree |
| 1  | Strongly agree    |                                                                                           |                                                                                                                                                                                                                                                                                          |   |                |   |       |   |         |   |          |   |                   |
| 2  | Agree             |                                                                                           |                                                                                                                                                                                                                                                                                          |   |                |   |       |   |         |   |          |   |                   |
| 3  | Neutral           |                                                                                           |                                                                                                                                                                                                                                                                                          |   |                |   |       |   |         |   |          |   |                   |
| 4  | Disagree          |                                                                                           |                                                                                                                                                                                                                                                                                          |   |                |   |       |   |         |   |          |   |                   |
| 5  | Strongly disagree |                                                                                           |                                                                                                                                                                                                                                                                                          |   |                |   |       |   |         |   |          |   |                   |
| 21 | ld                | 'Lockdown' or 'stay at home' orders are justified                                         | <p>radio (Matrix)</p> <table border="1"> <tr><td>1</td><td>Strongly agree</td></tr> <tr><td>2</td><td>Agree</td></tr> <tr><td>3</td><td>Neutral</td></tr> <tr><td>4</td><td>Disagree</td></tr> <tr><td>5</td><td>Strongly disagree</td></tr> </table> <p>Field Annotation: LD</p>        | 1 | Strongly agree | 2 | Agree | 3 | Neutral | 4 | Disagree | 5 | Strongly disagree |
| 1  | Strongly agree    |                                                                                           |                                                                                                                                                                                                                                                                                          |   |                |   |       |   |         |   |          |   |                   |
| 2  | Agree             |                                                                                           |                                                                                                                                                                                                                                                                                          |   |                |   |       |   |         |   |          |   |                   |
| 3  | Neutral           |                                                                                           |                                                                                                                                                                                                                                                                                          |   |                |   |       |   |         |   |          |   |                   |
| 4  | Disagree          |                                                                                           |                                                                                                                                                                                                                                                                                          |   |                |   |       |   |         |   |          |   |                   |
| 5  | Strongly disagree |                                                                                           |                                                                                                                                                                                                                                                                                          |   |                |   |       |   |         |   |          |   |                   |
| 22 | hw                | 'Handwash for 20 seconds' whenever needed, is useful                                      | <p>radio (Matrix)</p> <table border="1"> <tr><td>1</td><td>Strongly agree</td></tr> <tr><td>2</td><td>Agree</td></tr> <tr><td>3</td><td>Neutral</td></tr> <tr><td>4</td><td>Disagree</td></tr> <tr><td>5</td><td>Strongly disagree</td></tr> </table> <p>Field Annotation: HW</p>        | 1 | Strongly agree | 2 | Agree | 3 | Neutral | 4 | Disagree | 5 | Strongly disagree |
| 1  | Strongly agree    |                                                                                           |                                                                                                                                                                                                                                                                                          |   |                |   |       |   |         |   |          |   |                   |
| 2  | Agree             |                                                                                           |                                                                                                                                                                                                                                                                                          |   |                |   |       |   |         |   |          |   |                   |
| 3  | Neutral           |                                                                                           |                                                                                                                                                                                                                                                                                          |   |                |   |       |   |         |   |          |   |                   |
| 4  | Disagree          |                                                                                           |                                                                                                                                                                                                                                                                                          |   |                |   |       |   |         |   |          |   |                   |
| 5  | Strongly disagree |                                                                                           |                                                                                                                                                                                                                                                                                          |   |                |   |       |   |         |   |          |   |                   |
| 23 | fm                | 'Face mask' in public should be mandatory                                                 | <p>radio (Matrix)</p> <table border="1"> <tr><td>1</td><td>Strongly agree</td></tr> <tr><td>2</td><td>Agree</td></tr> <tr><td>3</td><td>Neutral</td></tr> <tr><td>4</td><td>Disagree</td></tr> <tr><td>5</td><td>Strongly disagree</td></tr> </table> <p>Field Annotation: FM</p>        | 1 | Strongly agree | 2 | Agree | 3 | Neutral | 4 | Disagree | 5 | Strongly disagree |
| 1  | Strongly agree    |                                                                                           |                                                                                                                                                                                                                                                                                          |   |                |   |       |   |         |   |          |   |                   |
| 2  | Agree             |                                                                                           |                                                                                                                                                                                                                                                                                          |   |                |   |       |   |         |   |          |   |                   |
| 3  | Neutral           |                                                                                           |                                                                                                                                                                                                                                                                                          |   |                |   |       |   |         |   |          |   |                   |
| 4  | Disagree          |                                                                                           |                                                                                                                                                                                                                                                                                          |   |                |   |       |   |         |   |          |   |                   |
| 5  | Strongly disagree |                                                                                           |                                                                                                                                                                                                                                                                                          |   |                |   |       |   |         |   |          |   |                   |
| 24 | er                | One should go to Emergency/doctor immediately if he/she has symptoms like COVID-19        | <p>radio (Matrix)</p> <table border="1"> <tr><td>1</td><td>Strongly agree</td></tr> <tr><td>2</td><td>Agree</td></tr> <tr><td>3</td><td>Neutral</td></tr> <tr><td>4</td><td>Disagree</td></tr> <tr><td>5</td><td>Strongly disagree</td></tr> </table> <p>Field Annotation: ER</p>        | 1 | Strongly agree | 2 | Agree | 3 | Neutral | 4 | Disagree | 5 | Strongly disagree |
| 1  | Strongly agree    |                                                                                           |                                                                                                                                                                                                                                                                                          |   |                |   |       |   |         |   |          |   |                   |
| 2  | Agree             |                                                                                           |                                                                                                                                                                                                                                                                                          |   |                |   |       |   |         |   |          |   |                   |
| 3  | Neutral           |                                                                                           |                                                                                                                                                                                                                                                                                          |   |                |   |       |   |         |   |          |   |                   |
| 4  | Disagree          |                                                                                           |                                                                                                                                                                                                                                                                                          |   |                |   |       |   |         |   |          |   |                   |
| 5  | Strongly disagree |                                                                                           |                                                                                                                                                                                                                                                                                          |   |                |   |       |   |         |   |          |   |                   |
| 25 | reopening         | Reopening of your state is a right decision                                               | <p>radio (Matrix)</p> <table border="1"> <tr><td>1</td><td>Strongly agree</td></tr> <tr><td>2</td><td>Agree</td></tr> <tr><td>3</td><td>Neutral</td></tr> <tr><td>4</td><td>Disagree</td></tr> <tr><td>5</td><td>Strongly disagree</td></tr> </table> <p>Field Annotation: reopening</p> | 1 | Strongly agree | 2 | Agree | 3 | Neutral | 4 | Disagree | 5 | Strongly disagree |
| 1  | Strongly agree    |                                                                                           |                                                                                                                                                                                                                                                                                          |   |                |   |       |   |         |   |          |   |                   |
| 2  | Agree             |                                                                                           |                                                                                                                                                                                                                                                                                          |   |                |   |       |   |         |   |          |   |                   |
| 3  | Neutral           |                                                                                           |                                                                                                                                                                                                                                                                                          |   |                |   |       |   |         |   |          |   |                   |
| 4  | Disagree          |                                                                                           |                                                                                                                                                                                                                                                                                          |   |                |   |       |   |         |   |          |   |                   |
| 5  | Strongly disagree |                                                                                           |                                                                                                                                                                                                                                                                                          |   |                |   |       |   |         |   |          |   |                   |

|                                                                                                                                                                      |                                |                                                                                                                                    |                                                                                                                                                                                                                                                                                             |   |                |   |            |   |          |   |          |   |                   |
|----------------------------------------------------------------------------------------------------------------------------------------------------------------------|--------------------------------|------------------------------------------------------------------------------------------------------------------------------------|---------------------------------------------------------------------------------------------------------------------------------------------------------------------------------------------------------------------------------------------------------------------------------------------|---|----------------|---|------------|---|----------|---|----------|---|-------------------|
| 26                                                                                                                                                                   | second_wave                    | Reopening would lead to a second spike of COVID-19 cases                                                                           | <p>radio (Matrix)</p> <table border="1"> <tr><td>1</td><td>Strongly agree</td></tr> <tr><td>2</td><td>Agree</td></tr> <tr><td>3</td><td>Neutral</td></tr> <tr><td>4</td><td>Disagree</td></tr> <tr><td>5</td><td>Strongly disagree</td></tr> </table> <p>Field Annotation: second spike</p> | 1 | Strongly agree | 2 | Agree      | 3 | Neutral  | 4 | Disagree | 5 | Strongly disagree |
| 1                                                                                                                                                                    | Strongly agree                 |                                                                                                                                    |                                                                                                                                                                                                                                                                                             |   |                |   |            |   |          |   |          |   |                   |
| 2                                                                                                                                                                    | Agree                          |                                                                                                                                    |                                                                                                                                                                                                                                                                                             |   |                |   |            |   |          |   |          |   |                   |
| 3                                                                                                                                                                    | Neutral                        |                                                                                                                                    |                                                                                                                                                                                                                                                                                             |   |                |   |            |   |          |   |          |   |                   |
| 4                                                                                                                                                                    | Disagree                       |                                                                                                                                    |                                                                                                                                                                                                                                                                                             |   |                |   |            |   |          |   |          |   |                   |
| 5                                                                                                                                                                    | Strongly disagree              |                                                                                                                                    |                                                                                                                                                                                                                                                                                             |   |                |   |            |   |          |   |          |   |                   |
| 27                                                                                                                                                                   | number                         | <p>Section Header: <i>COVID cases</i></p> <p>Actual number of COVID-19 cases are much higher than the number of reported cases</p> | <p>radio (Matrix)</p> <table border="1"> <tr><td>1</td><td>Strongly agree</td></tr> <tr><td>2</td><td>Agree</td></tr> <tr><td>3</td><td>Neutral</td></tr> <tr><td>4</td><td>Disagree</td></tr> <tr><td>5</td><td>Strongly disagree</td></tr> </table> <p>Field Annotation: number</p>       | 1 | Strongly agree | 2 | Agree      | 3 | Neutral  | 4 | Disagree | 5 | Strongly disagree |
| 1                                                                                                                                                                    | Strongly agree                 |                                                                                                                                    |                                                                                                                                                                                                                                                                                             |   |                |   |            |   |          |   |          |   |                   |
| 2                                                                                                                                                                    | Agree                          |                                                                                                                                    |                                                                                                                                                                                                                                                                                             |   |                |   |            |   |          |   |          |   |                   |
| 3                                                                                                                                                                    | Neutral                        |                                                                                                                                    |                                                                                                                                                                                                                                                                                             |   |                |   |            |   |          |   |          |   |                   |
| 4                                                                                                                                                                    | Disagree                       |                                                                                                                                    |                                                                                                                                                                                                                                                                                             |   |                |   |            |   |          |   |          |   |                   |
| 5                                                                                                                                                                    | Strongly disagree              |                                                                                                                                    |                                                                                                                                                                                                                                                                                             |   |                |   |            |   |          |   |          |   |                   |
| 28                                                                                                                                                                   | state                          | The situation of COVID-19 in your state is/was concerning                                                                          | <p>radio (Matrix)</p> <table border="1"> <tr><td>1</td><td>Strongly agree</td></tr> <tr><td>2</td><td>Agree</td></tr> <tr><td>3</td><td>Neutral</td></tr> <tr><td>4</td><td>Disagree</td></tr> <tr><td>5</td><td>Strongly disagree</td></tr> </table> <p>Field Annotation: state</p>        | 1 | Strongly agree | 2 | Agree      | 3 | Neutral  | 4 | Disagree | 5 | Strongly disagree |
| 1                                                                                                                                                                    | Strongly agree                 |                                                                                                                                    |                                                                                                                                                                                                                                                                                             |   |                |   |            |   |          |   |          |   |                   |
| 2                                                                                                                                                                    | Agree                          |                                                                                                                                    |                                                                                                                                                                                                                                                                                             |   |                |   |            |   |          |   |          |   |                   |
| 3                                                                                                                                                                    | Neutral                        |                                                                                                                                    |                                                                                                                                                                                                                                                                                             |   |                |   |            |   |          |   |          |   |                   |
| 4                                                                                                                                                                    | Disagree                       |                                                                                                                                    |                                                                                                                                                                                                                                                                                             |   |                |   |            |   |          |   |          |   |                   |
| 5                                                                                                                                                                    | Strongly disagree              |                                                                                                                                    |                                                                                                                                                                                                                                                                                             |   |                |   |            |   |          |   |          |   |                   |
| 29                                                                                                                                                                   | belief                         | COVID-19 can be controlled by the end of 2020                                                                                      | <p>radio (Matrix)</p> <table border="1"> <tr><td>1</td><td>Strongly agree</td></tr> <tr><td>2</td><td>Agree</td></tr> <tr><td>3</td><td>Neutral</td></tr> <tr><td>4</td><td>Disagree</td></tr> <tr><td>5</td><td>Strongly disagree</td></tr> </table> <p>Field Annotation: belief</p>       | 1 | Strongly agree | 2 | Agree      | 3 | Neutral  | 4 | Disagree | 5 | Strongly disagree |
| 1                                                                                                                                                                    | Strongly agree                 |                                                                                                                                    |                                                                                                                                                                                                                                                                                             |   |                |   |            |   |          |   |          |   |                   |
| 2                                                                                                                                                                    | Agree                          |                                                                                                                                    |                                                                                                                                                                                                                                                                                             |   |                |   |            |   |          |   |          |   |                   |
| 3                                                                                                                                                                    | Neutral                        |                                                                                                                                    |                                                                                                                                                                                                                                                                                             |   |                |   |            |   |          |   |          |   |                   |
| 4                                                                                                                                                                    | Disagree                       |                                                                                                                                    |                                                                                                                                                                                                                                                                                             |   |                |   |            |   |          |   |          |   |                   |
| 5                                                                                                                                                                    | Strongly disagree              |                                                                                                                                    |                                                                                                                                                                                                                                                                                             |   |                |   |            |   |          |   |          |   |                   |
| 30                                                                                                                                                                   | concern_about_covid19_complete | <p>Section Header: <i>Form Status</i></p> <p>Complete?</p>                                                                         | <p>dropdown</p> <table border="1"> <tr><td>0</td><td>Incomplete</td></tr> <tr><td>1</td><td>Unverified</td></tr> <tr><td>2</td><td>Complete</td></tr> </table>                                                                                                                              | 0 | Incomplete     | 1 | Unverified | 2 | Complete |   |          |   |                   |
| 0                                                                                                                                                                    | Incomplete                     |                                                                                                                                    |                                                                                                                                                                                                                                                                                             |   |                |   |            |   |          |   |          |   |                   |
| 1                                                                                                                                                                    | Unverified                     |                                                                                                                                    |                                                                                                                                                                                                                                                                                             |   |                |   |            |   |          |   |          |   |                   |
| 2                                                                                                                                                                    | Complete                       |                                                                                                                                    |                                                                                                                                                                                                                                                                                             |   |                |   |            |   |          |   |          |   |                   |
| Instrument: <b>Knowledge On Covid19</b> (knowledge_on_covid19)  Enabled as survey |                                |                                                                                                                                    | <a href="#">^ Collapse</a>                                                                                                                                                                                                                                                                  |   |                |   |            |   |          |   |          |   |                   |
| 31                                                                                                                                                                   | age                            | <p>Section Header: <i>Who are at high risk for serious coronavirus infection ?</i></p> <p>Elderly people (age &gt;60 years)</p>    | <p>radio (Matrix)</p> <table border="1"> <tr><td>1</td><td>Yes</td></tr> <tr><td>0</td><td>No</td></tr> </table> <p>Field Annotation: age</p>                                                                                                                                               | 1 | Yes            | 0 | No         |   |          |   |          |   |                   |
| 1                                                                                                                                                                    | Yes                            |                                                                                                                                    |                                                                                                                                                                                                                                                                                             |   |                |   |            |   |          |   |          |   |                   |
| 0                                                                                                                                                                    | No                             |                                                                                                                                    |                                                                                                                                                                                                                                                                                             |   |                |   |            |   |          |   |          |   |                   |
| 32                                                                                                                                                                   | child                          | Children (0-5 years)                                                                                                               | <p>radio (Matrix)</p> <table border="1"> <tr><td>1</td><td>Yes</td></tr> <tr><td>0</td><td>No</td></tr> </table> <p>Field Annotation: child</p>                                                                                                                                             | 1 | Yes            | 0 | No         |   |          |   |          |   |                   |
| 1                                                                                                                                                                    | Yes                            |                                                                                                                                    |                                                                                                                                                                                                                                                                                             |   |                |   |            |   |          |   |          |   |                   |
| 0                                                                                                                                                                    | No                             |                                                                                                                                    |                                                                                                                                                                                                                                                                                             |   |                |   |            |   |          |   |          |   |                   |
| 33                                                                                                                                                                   | smoke                          | Smokers                                                                                                                            | <p>radio (Matrix)</p> <table border="1"> <tr><td>1</td><td>Yes</td></tr> <tr><td>0</td><td>No</td></tr> </table> <p>Field Annotation: smoke</p>                                                                                                                                             | 1 | Yes            | 0 | No         |   |          |   |          |   |                   |
| 1                                                                                                                                                                    | Yes                            |                                                                                                                                    |                                                                                                                                                                                                                                                                                             |   |                |   |            |   |          |   |          |   |                   |
| 0                                                                                                                                                                    | No                             |                                                                                                                                    |                                                                                                                                                                                                                                                                                             |   |                |   |            |   |          |   |          |   |                   |

|    |            |                                                                                             |                                                                                                                                              |   |     |   |    |
|----|------------|---------------------------------------------------------------------------------------------|----------------------------------------------------------------------------------------------------------------------------------------------|---|-----|---|----|
| 34 | dm         | Diabetic patients                                                                           | radio (Matrix)<br><table border="1"> <tr><td>1</td><td>Yes</td></tr> <tr><td>0</td><td>No</td></tr> </table><br>Field Annotation: DM         | 1 | Yes | 0 | No |
| 1  | Yes        |                                                                                             |                                                                                                                                              |   |     |   |    |
| 0  | No         |                                                                                             |                                                                                                                                              |   |     |   |    |
| 35 | immune     | People without ability to fight infection                                                   | radio (Matrix)<br><table border="1"> <tr><td>1</td><td>Yes</td></tr> <tr><td>0</td><td>No</td></tr> </table><br>Field Annotation: Immune     | 1 | Yes | 0 | No |
| 1  | Yes        |                                                                                             |                                                                                                                                              |   |     |   |    |
| 0  | No         |                                                                                             |                                                                                                                                              |   |     |   |    |
| 36 | pregnant   | Pregnant women                                                                              | radio (Matrix)<br><table border="1"> <tr><td>1</td><td>Yes</td></tr> <tr><td>0</td><td>No</td></tr> </table><br>Field Annotation: pregnant   | 1 | Yes | 0 | No |
| 1  | Yes        |                                                                                             |                                                                                                                                              |   |     |   |    |
| 0  | No         |                                                                                             |                                                                                                                                              |   |     |   |    |
| 37 | hosp_rate  | Section Header: <i>Knowledge on COVID-19</i><br>Most COVID-19 patients need hospitalization | radio (Matrix)<br><table border="1"> <tr><td>1</td><td>Yes</td></tr> <tr><td>0</td><td>No</td></tr> </table><br>Field Annotation: most       | 1 | Yes | 0 | No |
| 1  | Yes        |                                                                                             |                                                                                                                                              |   |     |   |    |
| 0  | No         |                                                                                             |                                                                                                                                              |   |     |   |    |
| 38 | death_rate | One in five COVID-19 patients die                                                           | radio (Matrix)<br><table border="1"> <tr><td>1</td><td>Yes</td></tr> <tr><td>0</td><td>No</td></tr> </table><br>Field Annotation: Die        | 1 | Yes | 0 | No |
| 1  | Yes        |                                                                                             |                                                                                                                                              |   |     |   |    |
| 0  | No         |                                                                                             |                                                                                                                                              |   |     |   |    |
| 39 | incubation | It takes 2-3 weeks to have disease symptoms after getting coronavirus                       | radio (Matrix)<br><table border="1"> <tr><td>1</td><td>Yes</td></tr> <tr><td>0</td><td>No</td></tr> </table><br>Field Annotation: incubation | 1 | Yes | 0 | No |
| 1  | Yes        |                                                                                             |                                                                                                                                              |   |     |   |    |
| 0  | No         |                                                                                             |                                                                                                                                              |   |     |   |    |
| 40 | corona     | Before COVID-19, we did not know that coronavirus can affect human                          | radio (Matrix)<br><table border="1"> <tr><td>1</td><td>Yes</td></tr> <tr><td>0</td><td>No</td></tr> </table><br>Field Annotation: corona     | 1 | Yes | 0 | No |
| 1  | Yes        |                                                                                             |                                                                                                                                              |   |     |   |    |
| 0  | No         |                                                                                             |                                                                                                                                              |   |     |   |    |
| 41 | animal     | We can get COVID-19 from animals                                                            | radio (Matrix)<br><table border="1"> <tr><td>1</td><td>Yes</td></tr> <tr><td>0</td><td>No</td></tr> </table><br>Field Annotation: Animal     | 1 | Yes | 0 | No |
| 1  | Yes        |                                                                                             |                                                                                                                                              |   |     |   |    |
| 0  | No         |                                                                                             |                                                                                                                                              |   |     |   |    |
| 42 | screening  | Every person in the community should be tested for COVID-19                                 | radio (Matrix)<br><table border="1"> <tr><td>1</td><td>Yes</td></tr> <tr><td>0</td><td>No</td></tr> </table><br>Field Annotation: test       | 1 | Yes | 0 | No |
| 1  | Yes        |                                                                                             |                                                                                                                                              |   |     |   |    |
| 0  | No         |                                                                                             |                                                                                                                                              |   |     |   |    |
| 43 | hand_wash  | Section Header: <i>Which of the following helps to prevent COVID-19 ?</i><br>Hand washing   | radio (Matrix)<br><table border="1"> <tr><td>1</td><td>Yes</td></tr> <tr><td>0</td><td>No</td></tr> </table><br>Field Annotation: prevent    | 1 | Yes | 0 | No |
| 1  | Yes        |                                                                                             |                                                                                                                                              |   |     |   |    |
| 0  | No         |                                                                                             |                                                                                                                                              |   |     |   |    |
| 44 | climate    | Hot and humid climate                                                                       | radio (Matrix)<br><table border="1"> <tr><td>1</td><td>Yes</td></tr> <tr><td>0</td><td>No</td></tr> </table><br>Field Annotation: climate    | 1 | Yes | 0 | No |
| 1  | Yes        |                                                                                             |                                                                                                                                              |   |     |   |    |
| 0  | No         |                                                                                             |                                                                                                                                              |   |     |   |    |

|    |                                                           |                                                                      |                                                                                                                                                                                                                                                                                                                                                                                                                                 |   |                                                           |                                           |                                                  |                   |                                                                      |   |                        |                     |   |                   |           |   |                   |             |
|----|-----------------------------------------------------------|----------------------------------------------------------------------|---------------------------------------------------------------------------------------------------------------------------------------------------------------------------------------------------------------------------------------------------------------------------------------------------------------------------------------------------------------------------------------------------------------------------------|---|-----------------------------------------------------------|-------------------------------------------|--------------------------------------------------|-------------------|----------------------------------------------------------------------|---|------------------------|---------------------|---|-------------------|-----------|---|-------------------|-------------|
| 45 | sunlight                                                  | Exposure to bright sunlight                                          | <p>radio (Matrix)</p> <table border="1"> <tr> <td>1</td> <td>Yes</td> </tr> <tr> <td>0</td> <td>No</td> </tr> </table> <p>Field Annotation: sunlight</p>                                                                                                                                                                                                                                                                        | 1 | Yes                                                       | 0                                         | No                                               |                   |                                                                      |   |                        |                     |   |                   |           |   |                   |             |
| 1  | Yes                                                       |                                                                      |                                                                                                                                                                                                                                                                                                                                                                                                                                 |   |                                                           |                                           |                                                  |                   |                                                                      |   |                        |                     |   |                   |           |   |                   |             |
| 0  | No                                                        |                                                                      |                                                                                                                                                                                                                                                                                                                                                                                                                                 |   |                                                           |                                           |                                                  |                   |                                                                      |   |                        |                     |   |                   |           |   |                   |             |
| 46 | nasal_spray                                               | Saline nasal spray                                                   | <p>radio (Matrix)</p> <table border="1"> <tr> <td>1</td> <td>Yes</td> </tr> <tr> <td>0</td> <td>No</td> </tr> </table> <p>Field Annotation: nasal spray</p>                                                                                                                                                                                                                                                                     | 1 | Yes                                                       | 0                                         | No                                               |                   |                                                                      |   |                        |                     |   |                   |           |   |                   |             |
| 1  | Yes                                                       |                                                                      |                                                                                                                                                                                                                                                                                                                                                                                                                                 |   |                                                           |                                           |                                                  |                   |                                                                      |   |                        |                     |   |                   |           |   |                   |             |
| 0  | No                                                        |                                                                      |                                                                                                                                                                                                                                                                                                                                                                                                                                 |   |                                                           |                                           |                                                  |                   |                                                                      |   |                        |                     |   |                   |           |   |                   |             |
| 47 | hot_beverages                                             | Drinking hot beverages or alcohol                                    | <p>radio (Matrix)</p> <table border="1"> <tr> <td>1</td> <td>Yes</td> </tr> <tr> <td>0</td> <td>No</td> </tr> </table> <p>Field Annotation: hot beverages</p>                                                                                                                                                                                                                                                                   | 1 | Yes                                                       | 0                                         | No                                               |                   |                                                                      |   |                        |                     |   |                   |           |   |                   |             |
| 1  | Yes                                                       |                                                                      |                                                                                                                                                                                                                                                                                                                                                                                                                                 |   |                                                           |                                           |                                                  |                   |                                                                      |   |                        |                     |   |                   |           |   |                   |             |
| 0  | No                                                        |                                                                      |                                                                                                                                                                                                                                                                                                                                                                                                                                 |   |                                                           |                                           |                                                  |                   |                                                                      |   |                        |                     |   |                   |           |   |                   |             |
| 48 | hand_sanitize                                             | Hand sanitizer containing alcohol                                    | <p>radio (Matrix)</p> <table border="1"> <tr> <td>1</td> <td>Yes</td> </tr> <tr> <td>0</td> <td>No</td> </tr> </table> <p>Field Annotation: Hand sanitize</p>                                                                                                                                                                                                                                                                   | 1 | Yes                                                       | 0                                         | No                                               |                   |                                                                      |   |                        |                     |   |                   |           |   |                   |             |
| 1  | Yes                                                       |                                                                      |                                                                                                                                                                                                                                                                                                                                                                                                                                 |   |                                                           |                                           |                                                  |                   |                                                                      |   |                        |                     |   |                   |           |   |                   |             |
| 0  | No                                                        |                                                                      |                                                                                                                                                                                                                                                                                                                                                                                                                                 |   |                                                           |                                           |                                                  |                   |                                                                      |   |                        |                     |   |                   |           |   |                   |             |
| 49 | baby_wipes                                                | Baby wipes                                                           | <p>radio (Matrix)</p> <table border="1"> <tr> <td>1</td> <td>Yes</td> </tr> <tr> <td>0</td> <td>No</td> </tr> </table> <p>Field Annotation: Baby wipes</p>                                                                                                                                                                                                                                                                      | 1 | Yes                                                       | 0                                         | No                                               |                   |                                                                      |   |                        |                     |   |                   |           |   |                   |             |
| 1  | Yes                                                       |                                                                      |                                                                                                                                                                                                                                                                                                                                                                                                                                 |   |                                                           |                                           |                                                  |                   |                                                                      |   |                        |                     |   |                   |           |   |                   |             |
| 0  | No                                                        |                                                                      |                                                                                                                                                                                                                                                                                                                                                                                                                                 |   |                                                           |                                           |                                                  |                   |                                                                      |   |                        |                     |   |                   |           |   |                   |             |
| 50 | covid_symptoms                                            | COVID-19 symptoms include (CHECK ALL THAT APPLY) :                   | <p>checkbox</p> <table border="1"> <tr> <td>1</td> <td>covid_symptoms__1</td> <td>Fever</td> </tr> <tr> <td>2</td> <td>covid_symptoms__2</td> <td>Cough</td> </tr> <tr> <td>3</td> <td>covid_symptoms__3</td> <td>Shortness of breath</td> </tr> <tr> <td>4</td> <td>covid_symptoms__4</td> <td>Body ache</td> </tr> <tr> <td>5</td> <td>covid_symptoms__5</td> <td>Sore throat</td> </tr> </table> <p>Custom alignment: LV</p> | 1 | covid_symptoms__1                                         | Fever                                     | 2                                                | covid_symptoms__2 | Cough                                                                | 3 | covid_symptoms__3      | Shortness of breath | 4 | covid_symptoms__4 | Body ache | 5 | covid_symptoms__5 | Sore throat |
| 1  | covid_symptoms__1                                         | Fever                                                                |                                                                                                                                                                                                                                                                                                                                                                                                                                 |   |                                                           |                                           |                                                  |                   |                                                                      |   |                        |                     |   |                   |           |   |                   |             |
| 2  | covid_symptoms__2                                         | Cough                                                                |                                                                                                                                                                                                                                                                                                                                                                                                                                 |   |                                                           |                                           |                                                  |                   |                                                                      |   |                        |                     |   |                   |           |   |                   |             |
| 3  | covid_symptoms__3                                         | Shortness of breath                                                  |                                                                                                                                                                                                                                                                                                                                                                                                                                 |   |                                                           |                                           |                                                  |                   |                                                                      |   |                        |                     |   |                   |           |   |                   |             |
| 4  | covid_symptoms__4                                         | Body ache                                                            |                                                                                                                                                                                                                                                                                                                                                                                                                                 |   |                                                           |                                           |                                                  |                   |                                                                      |   |                        |                     |   |                   |           |   |                   |             |
| 5  | covid_symptoms__5                                         | Sore throat                                                          |                                                                                                                                                                                                                                                                                                                                                                                                                                 |   |                                                           |                                           |                                                  |                   |                                                                      |   |                        |                     |   |                   |           |   |                   |             |
| 51 | vaccine_pcv_flu                                           | Vaccines :                                                           | <p>radio</p> <table border="1"> <tr> <td>1</td> <td>Pneumonia vaccine offers some protection against COVID-19</td> </tr> <tr> <td>2</td> <td>Flu shot offers some protection against COVID-19</td> </tr> <tr> <td>3</td> <td>Both 1 and 2 are true</td> </tr> <tr> <td>4</td> <td>Both 1 and 2 are false</td> </tr> </table> <p>Custom alignment: LV</p>                                                                        | 1 | Pneumonia vaccine offers some protection against COVID-19 | 2                                         | Flu shot offers some protection against COVID-19 | 3                 | Both 1 and 2 are true                                                | 4 | Both 1 and 2 are false |                     |   |                   |           |   |                   |             |
| 1  | Pneumonia vaccine offers some protection against COVID-19 |                                                                      |                                                                                                                                                                                                                                                                                                                                                                                                                                 |   |                                                           |                                           |                                                  |                   |                                                                      |   |                        |                     |   |                   |           |   |                   |             |
| 2  | Flu shot offers some protection against COVID-19          |                                                                      |                                                                                                                                                                                                                                                                                                                                                                                                                                 |   |                                                           |                                           |                                                  |                   |                                                                      |   |                        |                     |   |                   |           |   |                   |             |
| 3  | Both 1 and 2 are true                                     |                                                                      |                                                                                                                                                                                                                                                                                                                                                                                                                                 |   |                                                           |                                           |                                                  |                   |                                                                      |   |                        |                     |   |                   |           |   |                   |             |
| 4  | Both 1 and 2 are false                                    |                                                                      |                                                                                                                                                                                                                                                                                                                                                                                                                                 |   |                                                           |                                           |                                                  |                   |                                                                      |   |                        |                     |   |                   |           |   |                   |             |
| 52 | mask_gloves                                               | Protective measures (CHECK ALL THAT APPLY) :                         | <p>checkbox</p> <table border="1"> <tr> <td>1</td> <td>mask_gloves__1</td> <td>Face-mask prevents the spread of COVID-19</td> </tr> <tr> <td>2</td> <td>mask_gloves__2</td> <td>Rubber gloves should be used while going outside (such as groceries)</td> </tr> </table> <p>Custom alignment: LV</p>                                                                                                                            | 1 | mask_gloves__1                                            | Face-mask prevents the spread of COVID-19 | 2                                                | mask_gloves__2    | Rubber gloves should be used while going outside (such as groceries) |   |                        |                     |   |                   |           |   |                   |             |
| 1  | mask_gloves__1                                            | Face-mask prevents the spread of COVID-19                            |                                                                                                                                                                                                                                                                                                                                                                                                                                 |   |                                                           |                                           |                                                  |                   |                                                                      |   |                        |                     |   |                   |           |   |                   |             |
| 2  | mask_gloves__2                                            | Rubber gloves should be used while going outside (such as groceries) |                                                                                                                                                                                                                                                                                                                                                                                                                                 |   |                                                           |                                           |                                                  |                   |                                                                      |   |                        |                     |   |                   |           |   |                   |             |

|                                                                                                                                                                                                                                     |                               |                                                                                                |                                                                                                                                                                                                                                                                                                                                          |   |                |                    |                     |           |                          |   |            |                                |                   |           |          |
|-------------------------------------------------------------------------------------------------------------------------------------------------------------------------------------------------------------------------------------|-------------------------------|------------------------------------------------------------------------------------------------|------------------------------------------------------------------------------------------------------------------------------------------------------------------------------------------------------------------------------------------------------------------------------------------------------------------------------------------|---|----------------|--------------------|---------------------|-----------|--------------------------|---|------------|--------------------------------|-------------------|-----------|----------|
| 53                                                                                                                                                                                                                                  | social_distance_feet          | Social distancing means keeping ____feet gap between two persons :                             | radio<br><table border="1"> <tr><td>1</td><td>3 feet</td></tr> <tr><td>2</td><td>6 feet</td></tr> <tr><td>3</td><td>10 feet</td></tr> <tr><td>4</td><td>15 feet</td></tr> </table> Custom alignment: LV                                                                                                                                  | 1 | 3 feet         | 2                  | 6 feet              | 3         | 10 feet                  | 4 | 15 feet    |                                |                   |           |          |
| 1                                                                                                                                                                                                                                   | 3 feet                        |                                                                                                |                                                                                                                                                                                                                                                                                                                                          |   |                |                    |                     |           |                          |   |            |                                |                   |           |          |
| 2                                                                                                                                                                                                                                   | 6 feet                        |                                                                                                |                                                                                                                                                                                                                                                                                                                                          |   |                |                    |                     |           |                          |   |            |                                |                   |           |          |
| 3                                                                                                                                                                                                                                   | 10 feet                       |                                                                                                |                                                                                                                                                                                                                                                                                                                                          |   |                |                    |                     |           |                          |   |            |                                |                   |           |          |
| 4                                                                                                                                                                                                                                   | 15 feet                       |                                                                                                |                                                                                                                                                                                                                                                                                                                                          |   |                |                    |                     |           |                          |   |            |                                |                   |           |          |
| 54                                                                                                                                                                                                                                  | isolation                     | If you had contact with a COVID-19 patient, you should be isolated for :                       | radio<br><table border="1"> <tr><td>1</td><td>One week</td></tr> <tr><td>2</td><td>Two weeks</td></tr> <tr><td>3</td><td>Three weeks</td></tr> <tr><td>4</td><td>Four weeks</td></tr> </table> Custom alignment: LV                                                                                                                      | 1 | One week       | 2                  | Two weeks           | 3         | Three weeks              | 4 | Four weeks |                                |                   |           |          |
| 1                                                                                                                                                                                                                                   | One week                      |                                                                                                |                                                                                                                                                                                                                                                                                                                                          |   |                |                    |                     |           |                          |   |            |                                |                   |           |          |
| 2                                                                                                                                                                                                                                   | Two weeks                     |                                                                                                |                                                                                                                                                                                                                                                                                                                                          |   |                |                    |                     |           |                          |   |            |                                |                   |           |          |
| 3                                                                                                                                                                                                                                   | Three weeks                   |                                                                                                |                                                                                                                                                                                                                                                                                                                                          |   |                |                    |                     |           |                          |   |            |                                |                   |           |          |
| 4                                                                                                                                                                                                                                   | Four weeks                    |                                                                                                |                                                                                                                                                                                                                                                                                                                                          |   |                |                    |                     |           |                          |   |            |                                |                   |           |          |
| 55                                                                                                                                                                                                                                  | corona_live                   | Coronavirus can live on a surface for :                                                        | radio<br><table border="1"> <tr><td>1</td><td>Up to 6 hours</td></tr> <tr><td>2</td><td>Few hours to 3 days</td></tr> <tr><td>3</td><td>Up to 14 days</td></tr> </table> Custom alignment: LV                                                                                                                                            | 1 | Up to 6 hours  | 2                  | Few hours to 3 days | 3         | Up to 14 days            |   |            |                                |                   |           |          |
| 1                                                                                                                                                                                                                                   | Up to 6 hours                 |                                                                                                |                                                                                                                                                                                                                                                                                                                                          |   |                |                    |                     |           |                          |   |            |                                |                   |           |          |
| 2                                                                                                                                                                                                                                   | Few hours to 3 days           |                                                                                                |                                                                                                                                                                                                                                                                                                                                          |   |                |                    |                     |           |                          |   |            |                                |                   |           |          |
| 3                                                                                                                                                                                                                                   | Up to 14 days                 |                                                                                                |                                                                                                                                                                                                                                                                                                                                          |   |                |                    |                     |           |                          |   |            |                                |                   |           |          |
| 56                                                                                                                                                                                                                                  | spread                        | COVID-19 usually spreads via (CHECK ALL THAT APPLY) :                                          | checkbox<br><table border="1"> <tr><td>1</td><td>spread__1</td><td>Contact (by touch)</td></tr> <tr><td>2</td><td>spread__2</td><td>Droplet (such as sneeze)</td></tr> <tr><td>3</td><td>spread__3</td><td>Water (drinking water, shower)</td></tr> <tr><td>4</td><td>spread__4</td><td>Wind/air</td></tr> </table> Custom alignment: LV | 1 | spread__1      | Contact (by touch) | 2                   | spread__2 | Droplet (such as sneeze) | 3 | spread__3  | Water (drinking water, shower) | 4                 | spread__4 | Wind/air |
| 1                                                                                                                                                                                                                                   | spread__1                     | Contact (by touch)                                                                             |                                                                                                                                                                                                                                                                                                                                          |   |                |                    |                     |           |                          |   |            |                                |                   |           |          |
| 2                                                                                                                                                                                                                                   | spread__2                     | Droplet (such as sneeze)                                                                       |                                                                                                                                                                                                                                                                                                                                          |   |                |                    |                     |           |                          |   |            |                                |                   |           |          |
| 3                                                                                                                                                                                                                                   | spread__3                     | Water (drinking water, shower)                                                                 |                                                                                                                                                                                                                                                                                                                                          |   |                |                    |                     |           |                          |   |            |                                |                   |           |          |
| 4                                                                                                                                                                                                                                   | spread__4                     | Wind/air                                                                                       |                                                                                                                                                                                                                                                                                                                                          |   |                |                    |                     |           |                          |   |            |                                |                   |           |          |
| 57                                                                                                                                                                                                                                  | knowledge_on_covid19_complete | Section Header: <i>Form Status</i><br>Complete?                                                | dropdown<br><table border="1"> <tr><td>0</td><td>Incomplete</td></tr> <tr><td>1</td><td>Unverified</td></tr> <tr><td>2</td><td>Complete</td></tr> </table>                                                                                                                                                                               | 0 | Incomplete     | 1                  | Unverified          | 2         | Complete                 |   |            |                                |                   |           |          |
| 0                                                                                                                                                                                                                                   | Incomplete                    |                                                                                                |                                                                                                                                                                                                                                                                                                                                          |   |                |                    |                     |           |                          |   |            |                                |                   |           |          |
| 1                                                                                                                                                                                                                                   | Unverified                    |                                                                                                |                                                                                                                                                                                                                                                                                                                                          |   |                |                    |                     |           |                          |   |            |                                |                   |           |          |
| 2                                                                                                                                                                                                                                   | Complete                      |                                                                                                |                                                                                                                                                                                                                                                                                                                                          |   |                |                    |                     |           |                          |   |            |                                |                   |           |          |
| Instrument: <b>Treatment of COVID-19</b> (treatment_of_covid19)  Enabled as survey <span style="float: right;"><a href="#">^ Collapse</a></span> |                               |                                                                                                |                                                                                                                                                                                                                                                                                                                                          |   |                |                    |                     |           |                          |   |            |                                |                   |           |          |
| 58                                                                                                                                                                                                                                  | chloroquin                    | Section Header: <i>Treatment</i><br>Hydroxychloroquine (Plaquenil) is useful to treat COVID-19 | radio (Matrix)<br><table border="1"> <tr><td>1</td><td>Strongly agree</td></tr> <tr><td>2</td><td>Agree</td></tr> <tr><td>3</td><td>Neutral</td></tr> <tr><td>4</td><td>Disagree</td></tr> <tr><td>5</td><td>Strongly disagree</td></tr> </table> Field Annotation: chloroquin                                                           | 1 | Strongly agree | 2                  | Agree               | 3         | Neutral                  | 4 | Disagree   | 5                              | Strongly disagree |           |          |
| 1                                                                                                                                                                                                                                   | Strongly agree                |                                                                                                |                                                                                                                                                                                                                                                                                                                                          |   |                |                    |                     |           |                          |   |            |                                |                   |           |          |
| 2                                                                                                                                                                                                                                   | Agree                         |                                                                                                |                                                                                                                                                                                                                                                                                                                                          |   |                |                    |                     |           |                          |   |            |                                |                   |           |          |
| 3                                                                                                                                                                                                                                   | Neutral                       |                                                                                                |                                                                                                                                                                                                                                                                                                                                          |   |                |                    |                     |           |                          |   |            |                                |                   |           |          |
| 4                                                                                                                                                                                                                                   | Disagree                      |                                                                                                |                                                                                                                                                                                                                                                                                                                                          |   |                |                    |                     |           |                          |   |            |                                |                   |           |          |
| 5                                                                                                                                                                                                                                   | Strongly disagree             |                                                                                                |                                                                                                                                                                                                                                                                                                                                          |   |                |                    |                     |           |                          |   |            |                                |                   |           |          |
| 59                                                                                                                                                                                                                                  | drug_trial                    | I am willing to participate in future drug trials for COVID-19                                 | radio (Matrix)<br><table border="1"> <tr><td>1</td><td>Strongly agree</td></tr> <tr><td>2</td><td>Agree</td></tr> <tr><td>3</td><td>Neutral</td></tr> <tr><td>4</td><td>Disagree</td></tr> <tr><td>5</td><td>Strongly disagree</td></tr> </table> Field Annotation: drug trial                                                           | 1 | Strongly agree | 2                  | Agree               | 3         | Neutral                  | 4 | Disagree   | 5                              | Strongly disagree |           |          |
| 1                                                                                                                                                                                                                                   | Strongly agree                |                                                                                                |                                                                                                                                                                                                                                                                                                                                          |   |                |                    |                     |           |                          |   |            |                                |                   |           |          |
| 2                                                                                                                                                                                                                                   | Agree                         |                                                                                                |                                                                                                                                                                                                                                                                                                                                          |   |                |                    |                     |           |                          |   |            |                                |                   |           |          |
| 3                                                                                                                                                                                                                                   | Neutral                       |                                                                                                |                                                                                                                                                                                                                                                                                                                                          |   |                |                    |                     |           |                          |   |            |                                |                   |           |          |
| 4                                                                                                                                                                                                                                   | Disagree                      |                                                                                                |                                                                                                                                                                                                                                                                                                                                          |   |                |                    |                     |           |                          |   |            |                                |                   |           |          |
| 5                                                                                                                                                                                                                                   | Strongly disagree             |                                                                                                |                                                                                                                                                                                                                                                                                                                                          |   |                |                    |                     |           |                          |   |            |                                |                   |           |          |



|    |                   |                                                                                                                        |                                                                                                                                                                                                                                                                                 |   |                |   |          |   |          |   |                   |   |                   |
|----|-------------------|------------------------------------------------------------------------------------------------------------------------|---------------------------------------------------------------------------------------------------------------------------------------------------------------------------------------------------------------------------------------------------------------------------------|---|----------------|---|----------|---|----------|---|-------------------|---|-------------------|
| 60 | vaccine           | I am willing to participate in future vaccine trials for COVID-19                                                      | radio (Matrix) <table border="1"> <tr><td>1</td><td>Strongly agree</td></tr> <tr><td>2</td><td>Agree</td></tr> <tr><td>3</td><td>Neutral</td></tr> <tr><td>4</td><td>Disagree</td></tr> <tr><td>5</td><td>Strongly disagree</td></tr> </table> Field Annotation: vaccine        | 1 | Strongly agree | 2 | Agree    | 3 | Neutral  | 4 | Disagree          | 5 | Strongly disagree |
| 1  | Strongly agree    |                                                                                                                        |                                                                                                                                                                                                                                                                                 |   |                |   |          |   |          |   |                   |   |                   |
| 2  | Agree             |                                                                                                                        |                                                                                                                                                                                                                                                                                 |   |                |   |          |   |          |   |                   |   |                   |
| 3  | Neutral           |                                                                                                                        |                                                                                                                                                                                                                                                                                 |   |                |   |          |   |          |   |                   |   |                   |
| 4  | Disagree          |                                                                                                                        |                                                                                                                                                                                                                                                                                 |   |                |   |          |   |          |   |                   |   |                   |
| 5  | Strongly disagree |                                                                                                                        |                                                                                                                                                                                                                                                                                 |   |                |   |          |   |          |   |                   |   |                   |
| 61 | hospital          | Section Header: <i>Thoughts about your local hospital</i><br>Your local hospital can treat very sick COVID-19 patients | radio (Matrix) <table border="1"> <tr><td>1</td><td>Strongly agree</td></tr> <tr><td>2</td><td>Agree</td></tr> <tr><td>3</td><td>Neutral</td></tr> <tr><td>4</td><td>Disagree</td></tr> <tr><td>5</td><td>Strongly disagree</td></tr> </table> Field Annotation: hospital       | 1 | Strongly agree | 2 | Agree    | 3 | Neutral  | 4 | Disagree          | 5 | Strongly disagree |
| 1  | Strongly agree    |                                                                                                                        |                                                                                                                                                                                                                                                                                 |   |                |   |          |   |          |   |                   |   |                   |
| 2  | Agree             |                                                                                                                        |                                                                                                                                                                                                                                                                                 |   |                |   |          |   |          |   |                   |   |                   |
| 3  | Neutral           |                                                                                                                        |                                                                                                                                                                                                                                                                                 |   |                |   |          |   |          |   |                   |   |                   |
| 4  | Disagree          |                                                                                                                        |                                                                                                                                                                                                                                                                                 |   |                |   |          |   |          |   |                   |   |                   |
| 5  | Strongly disagree |                                                                                                                        |                                                                                                                                                                                                                                                                                 |   |                |   |          |   |          |   |                   |   |                   |
| 62 | vent              | Your local hospital has enough ventilators                                                                             | radio (Matrix) <table border="1"> <tr><td>1</td><td>Strongly agree</td></tr> <tr><td>2</td><td>Agree</td></tr> <tr><td>3</td><td>Neutral</td></tr> <tr><td>4</td><td>Disagree</td></tr> <tr><td>5</td><td>Strongly disagree</td></tr> </table> Field Annotation: vent           | 1 | Strongly agree | 2 | Agree    | 3 | Neutral  | 4 | Disagree          | 5 | Strongly disagree |
| 1  | Strongly agree    |                                                                                                                        |                                                                                                                                                                                                                                                                                 |   |                |   |          |   |          |   |                   |   |                   |
| 2  | Agree             |                                                                                                                        |                                                                                                                                                                                                                                                                                 |   |                |   |          |   |          |   |                   |   |                   |
| 3  | Neutral           |                                                                                                                        |                                                                                                                                                                                                                                                                                 |   |                |   |          |   |          |   |                   |   |                   |
| 4  | Disagree          |                                                                                                                        |                                                                                                                                                                                                                                                                                 |   |                |   |          |   |          |   |                   |   |                   |
| 5  | Strongly disagree |                                                                                                                        |                                                                                                                                                                                                                                                                                 |   |                |   |          |   |          |   |                   |   |                   |
| 63 | administration    | The government of your state/country acted promptly to prevent COVID-19                                                | radio (Matrix) <table border="1"> <tr><td>1</td><td>Strongly agree</td></tr> <tr><td>2</td><td>Agree</td></tr> <tr><td>3</td><td>Neutral</td></tr> <tr><td>4</td><td>Disagree</td></tr> <tr><td>5</td><td>Strongly disagree</td></tr> </table> Field Annotation: administration | 1 | Strongly agree | 2 | Agree    | 3 | Neutral  | 4 | Disagree          | 5 | Strongly disagree |
| 1  | Strongly agree    |                                                                                                                        |                                                                                                                                                                                                                                                                                 |   |                |   |          |   |          |   |                   |   |                   |
| 2  | Agree             |                                                                                                                        |                                                                                                                                                                                                                                                                                 |   |                |   |          |   |          |   |                   |   |                   |
| 3  | Neutral           |                                                                                                                        |                                                                                                                                                                                                                                                                                 |   |                |   |          |   |          |   |                   |   |                   |
| 4  | Disagree          |                                                                                                                        |                                                                                                                                                                                                                                                                                 |   |                |   |          |   |          |   |                   |   |                   |
| 5  | Strongly disagree |                                                                                                                        |                                                                                                                                                                                                                                                                                 |   |                |   |          |   |          |   |                   |   |                   |
| 64 | new_vaccine       | Section Header: <i>Future hope</i><br>How soon do you think that a vaccine against COVID-19 will be available?         | radio (Matrix) <table border="1"> <tr><td>1</td><td>3 months</td></tr> <tr><td>2</td><td>6 months</td></tr> <tr><td>3</td><td>one year</td></tr> <tr><td>4</td><td>Two years or more</td></tr> </table> Field Annotation: new vaccine                                           | 1 | 3 months       | 2 | 6 months | 3 | one year | 4 | Two years or more |   |                   |
| 1  | 3 months          |                                                                                                                        |                                                                                                                                                                                                                                                                                 |   |                |   |          |   |          |   |                   |   |                   |
| 2  | 6 months          |                                                                                                                        |                                                                                                                                                                                                                                                                                 |   |                |   |          |   |          |   |                   |   |                   |
| 3  | one year          |                                                                                                                        |                                                                                                                                                                                                                                                                                 |   |                |   |          |   |          |   |                   |   |                   |
| 4  | Two years or more |                                                                                                                        |                                                                                                                                                                                                                                                                                 |   |                |   |          |   |          |   |                   |   |                   |
| 65 | new_medication    | How soon do you think that a medication to cure COVID-19 will be available?                                            | radio (Matrix) <table border="1"> <tr><td>1</td><td>3 months</td></tr> <tr><td>2</td><td>6 months</td></tr> <tr><td>3</td><td>one year</td></tr> <tr><td>4</td><td>Two years or more</td></tr> </table> Field Annotation: new_medication                                        | 1 | 3 months       | 2 | 6 months | 3 | one year | 4 | Two years or more |   |                   |
| 1  | 3 months          |                                                                                                                        |                                                                                                                                                                                                                                                                                 |   |                |   |          |   |          |   |                   |   |                   |
| 2  | 6 months          |                                                                                                                        |                                                                                                                                                                                                                                                                                 |   |                |   |          |   |          |   |                   |   |                   |
| 3  | one year          |                                                                                                                        |                                                                                                                                                                                                                                                                                 |   |                |   |          |   |          |   |                   |   |                   |
| 4  | Two years or more |                                                                                                                        |                                                                                                                                                                                                                                                                                 |   |                |   |          |   |          |   |                   |   |                   |
| 66 | covid_vaccine     | Would you like to get COVID-19 vaccine, If available?                                                                  | yesno <table border="1"> <tr><td>1</td><td>Yes</td></tr> <tr><td>0</td><td>No</td></tr> </table>                                                                                                                                                                                | 1 | Yes            | 0 | No       |   |          |   |                   |   |                   |
| 1  | Yes               |                                                                                                                        |                                                                                                                                                                                                                                                                                 |   |                |   |          |   |          |   |                   |   |                   |
| 0  | No                |                                                                                                                        |                                                                                                                                                                                                                                                                                 |   |                |   |          |   |          |   |                   |   |                   |

|    |                        |                                                                                                |                                                                                                                                                                                                                                                                                                                                                                                                                                                                                                              |   |                        |                       |             |                        |                                       |   |                        |                     |           |                        |                                 |   |                        |                           |   |   |   |   |   |    |    |
|----|------------------------|------------------------------------------------------------------------------------------------|--------------------------------------------------------------------------------------------------------------------------------------------------------------------------------------------------------------------------------------------------------------------------------------------------------------------------------------------------------------------------------------------------------------------------------------------------------------------------------------------------------------|---|------------------------|-----------------------|-------------|------------------------|---------------------------------------|---|------------------------|---------------------|-----------|------------------------|---------------------------------|---|------------------------|---------------------------|---|---|---|---|---|----|----|
| 67 | covid_vaccine_cause    | What is your biggest concern on COVID-19 vaccine (even if you will take it)?                   | checkbox<br><table border="1"> <tr> <td>1</td> <td>covid_vaccine_cause__1</td> <td>Possible side effects</td> </tr> <tr> <td>2</td> <td>covid_vaccine_cause__2</td> <td>Doubt about the benefits or necessity</td> </tr> <tr> <td>3</td> <td>covid_vaccine_cause__3</td> <td>Cost of the vaccine</td> </tr> <tr> <td>4</td> <td>covid_vaccine_cause__4</td> <td>Not at risk for serious disease</td> </tr> <tr> <td>5</td> <td>covid_vaccine_cause__5</td> <td>No specific cause/concern</td> </tr> </table> | 1 | covid_vaccine_cause__1 | Possible side effects | 2           | covid_vaccine_cause__2 | Doubt about the benefits or necessity | 3 | covid_vaccine_cause__3 | Cost of the vaccine | 4         | covid_vaccine_cause__4 | Not at risk for serious disease | 5 | covid_vaccine_cause__5 | No specific cause/concern |   |   |   |   |   |    |    |
| 1  | covid_vaccine_cause__1 | Possible side effects                                                                          |                                                                                                                                                                                                                                                                                                                                                                                                                                                                                                              |   |                        |                       |             |                        |                                       |   |                        |                     |           |                        |                                 |   |                        |                           |   |   |   |   |   |    |    |
| 2  | covid_vaccine_cause__2 | Doubt about the benefits or necessity                                                          |                                                                                                                                                                                                                                                                                                                                                                                                                                                                                                              |   |                        |                       |             |                        |                                       |   |                        |                     |           |                        |                                 |   |                        |                           |   |   |   |   |   |    |    |
| 3  | covid_vaccine_cause__3 | Cost of the vaccine                                                                            |                                                                                                                                                                                                                                                                                                                                                                                                                                                                                                              |   |                        |                       |             |                        |                                       |   |                        |                     |           |                        |                                 |   |                        |                           |   |   |   |   |   |    |    |
| 4  | covid_vaccine_cause__4 | Not at risk for serious disease                                                                |                                                                                                                                                                                                                                                                                                                                                                                                                                                                                                              |   |                        |                       |             |                        |                                       |   |                        |                     |           |                        |                                 |   |                        |                           |   |   |   |   |   |    |    |
| 5  | covid_vaccine_cause__5 | No specific cause/concern                                                                      |                                                                                                                                                                                                                                                                                                                                                                                                                                                                                                              |   |                        |                       |             |                        |                                       |   |                        |                     |           |                        |                                 |   |                        |                           |   |   |   |   |   |    |    |
| 68 | flu_shot_y_n           | Did you get a flu shot within last three years?                                                | yesno<br><table border="1"> <tr> <td>1</td> <td>Yes</td> </tr> <tr> <td>0</td> <td>No</td> </tr> </table> Custom alignment: LV                                                                                                                                                                                                                                                                                                                                                                               | 1 | Yes                    | 0                     | No          |                        |                                       |   |                        |                     |           |                        |                                 |   |                        |                           |   |   |   |   |   |    |    |
| 1  | Yes                    |                                                                                                |                                                                                                                                                                                                                                                                                                                                                                                                                                                                                                              |   |                        |                       |             |                        |                                       |   |                        |                     |           |                        |                                 |   |                        |                           |   |   |   |   |   |    |    |
| 0  | No                     |                                                                                                |                                                                                                                                                                                                                                                                                                                                                                                                                                                                                                              |   |                        |                       |             |                        |                                       |   |                        |                     |           |                        |                                 |   |                        |                           |   |   |   |   |   |    |    |
| 69 | section_5_8            | Since we now know how bad a viral infection can be, would you like to get Flu shot?            | radio<br><table border="1"> <tr> <td>1</td> <td>Yes</td> </tr> <tr> <td>0</td> <td>No</td> </tr> <tr> <td>2</td> <td>Not sure</td> </tr> </table> Custom alignment: LV                                                                                                                                                                                                                                                                                                                                       | 1 | Yes                    | 0                     | No          | 2                      | Not sure                              |   |                        |                     |           |                        |                                 |   |                        |                           |   |   |   |   |   |    |    |
| 1  | Yes                    |                                                                                                |                                                                                                                                                                                                                                                                                                                                                                                                                                                                                                              |   |                        |                       |             |                        |                                       |   |                        |                     |           |                        |                                 |   |                        |                           |   |   |   |   |   |    |    |
| 0  | No                     |                                                                                                |                                                                                                                                                                                                                                                                                                                                                                                                                                                                                                              |   |                        |                       |             |                        |                                       |   |                        |                     |           |                        |                                 |   |                        |                           |   |   |   |   |   |    |    |
| 2  | Not sure               |                                                                                                |                                                                                                                                                                                                                                                                                                                                                                                                                                                                                                              |   |                        |                       |             |                        |                                       |   |                        |                     |           |                        |                                 |   |                        |                           |   |   |   |   |   |    |    |
| 70 | confidence_level       | How confident you are about your answers: (0 is not confident at all and 10 is very confident) | radio<br><table border="1"> <tr><td>0</td><td>0</td></tr> <tr><td>1</td><td>1</td></tr> <tr><td>2</td><td>2</td></tr> <tr><td>3</td><td>3</td></tr> <tr><td>4</td><td>4</td></tr> <tr><td>5</td><td>5</td></tr> <tr><td>6</td><td>6</td></tr> <tr><td>7</td><td>7</td></tr> <tr><td>8</td><td>8</td></tr> <tr><td>9</td><td>9</td></tr> <tr><td>10</td><td>10</td></tr> </table> Custom alignment: LH                                                                                                        | 0 | 0                      | 1                     | 1           | 2                      | 2                                     | 3 | 3                      | 4                   | 4         | 5                      | 5                               | 6 | 6                      | 7                         | 7 | 8 | 8 | 9 | 9 | 10 | 10 |
| 0  | 0                      |                                                                                                |                                                                                                                                                                                                                                                                                                                                                                                                                                                                                                              |   |                        |                       |             |                        |                                       |   |                        |                     |           |                        |                                 |   |                        |                           |   |   |   |   |   |    |    |
| 1  | 1                      |                                                                                                |                                                                                                                                                                                                                                                                                                                                                                                                                                                                                                              |   |                        |                       |             |                        |                                       |   |                        |                     |           |                        |                                 |   |                        |                           |   |   |   |   |   |    |    |
| 2  | 2                      |                                                                                                |                                                                                                                                                                                                                                                                                                                                                                                                                                                                                                              |   |                        |                       |             |                        |                                       |   |                        |                     |           |                        |                                 |   |                        |                           |   |   |   |   |   |    |    |
| 3  | 3                      |                                                                                                |                                                                                                                                                                                                                                                                                                                                                                                                                                                                                                              |   |                        |                       |             |                        |                                       |   |                        |                     |           |                        |                                 |   |                        |                           |   |   |   |   |   |    |    |
| 4  | 4                      |                                                                                                |                                                                                                                                                                                                                                                                                                                                                                                                                                                                                                              |   |                        |                       |             |                        |                                       |   |                        |                     |           |                        |                                 |   |                        |                           |   |   |   |   |   |    |    |
| 5  | 5                      |                                                                                                |                                                                                                                                                                                                                                                                                                                                                                                                                                                                                                              |   |                        |                       |             |                        |                                       |   |                        |                     |           |                        |                                 |   |                        |                           |   |   |   |   |   |    |    |
| 6  | 6                      |                                                                                                |                                                                                                                                                                                                                                                                                                                                                                                                                                                                                                              |   |                        |                       |             |                        |                                       |   |                        |                     |           |                        |                                 |   |                        |                           |   |   |   |   |   |    |    |
| 7  | 7                      |                                                                                                |                                                                                                                                                                                                                                                                                                                                                                                                                                                                                                              |   |                        |                       |             |                        |                                       |   |                        |                     |           |                        |                                 |   |                        |                           |   |   |   |   |   |    |    |
| 8  | 8                      |                                                                                                |                                                                                                                                                                                                                                                                                                                                                                                                                                                                                                              |   |                        |                       |             |                        |                                       |   |                        |                     |           |                        |                                 |   |                        |                           |   |   |   |   |   |    |    |
| 9  | 9                      |                                                                                                |                                                                                                                                                                                                                                                                                                                                                                                                                                                                                                              |   |                        |                       |             |                        |                                       |   |                        |                     |           |                        |                                 |   |                        |                           |   |   |   |   |   |    |    |
| 10 | 10                     |                                                                                                |                                                                                                                                                                                                                                                                                                                                                                                                                                                                                                              |   |                        |                       |             |                        |                                       |   |                        |                     |           |                        |                                 |   |                        |                           |   |   |   |   |   |    |    |
| 71 | m_f                    | You are                                                                                        | radio<br><table border="1"> <tr> <td>1</td> <td>Male</td> </tr> <tr> <td>2</td> <td>Female</td> </tr> <tr> <td>3</td> <td>Prefer not to answer</td> </tr> </table> Custom alignment: LV<br>Field Annotation: We would like to know a little about you (and those will not identify you)                                                                                                                                                                                                                      | 1 | Male                   | 2                     | Female      | 3                      | Prefer not to answer                  |   |                        |                     |           |                        |                                 |   |                        |                           |   |   |   |   |   |    |    |
| 1  | Male                   |                                                                                                |                                                                                                                                                                                                                                                                                                                                                                                                                                                                                                              |   |                        |                       |             |                        |                                       |   |                        |                     |           |                        |                                 |   |                        |                           |   |   |   |   |   |    |    |
| 2  | Female                 |                                                                                                |                                                                                                                                                                                                                                                                                                                                                                                                                                                                                                              |   |                        |                       |             |                        |                                       |   |                        |                     |           |                        |                                 |   |                        |                           |   |   |   |   |   |    |    |
| 3  | Prefer not to answer   |                                                                                                |                                                                                                                                                                                                                                                                                                                                                                                                                                                                                                              |   |                        |                       |             |                        |                                       |   |                        |                     |           |                        |                                 |   |                        |                           |   |   |   |   |   |    |    |
| 72 | your_age               | Your age                                                                                       | radio<br><table border="1"> <tr> <td>1</td> <td>18-24 years</td> </tr> <tr> <td>2</td> <td>25-44 years</td> </tr> <tr> <td>3</td> <td>45-60 years</td> </tr> <tr> <td>4</td> <td>61-70 years</td> </tr> <tr> <td>5</td> <td>&gt;70 years</td> </tr> <tr> <td>6</td> <td>Prefer not to answer</td> </tr> </table> Custom alignment: LV                                                                                                                                                                        | 1 | 18-24 years            | 2                     | 25-44 years | 3                      | 45-60 years                           | 4 | 61-70 years            | 5                   | >70 years | 6                      | Prefer not to answer            |   |                        |                           |   |   |   |   |   |    |    |
| 1  | 18-24 years            |                                                                                                |                                                                                                                                                                                                                                                                                                                                                                                                                                                                                                              |   |                        |                       |             |                        |                                       |   |                        |                     |           |                        |                                 |   |                        |                           |   |   |   |   |   |    |    |
| 2  | 25-44 years            |                                                                                                |                                                                                                                                                                                                                                                                                                                                                                                                                                                                                                              |   |                        |                       |             |                        |                                       |   |                        |                     |           |                        |                                 |   |                        |                           |   |   |   |   |   |    |    |
| 3  | 45-60 years            |                                                                                                |                                                                                                                                                                                                                                                                                                                                                                                                                                                                                                              |   |                        |                       |             |                        |                                       |   |                        |                     |           |                        |                                 |   |                        |                           |   |   |   |   |   |    |    |
| 4  | 61-70 years            |                                                                                                |                                                                                                                                                                                                                                                                                                                                                                                                                                                                                                              |   |                        |                       |             |                        |                                       |   |                        |                     |           |                        |                                 |   |                        |                           |   |   |   |   |   |    |    |
| 5  | >70 years              |                                                                                                |                                                                                                                                                                                                                                                                                                                                                                                                                                                                                                              |   |                        |                       |             |                        |                                       |   |                        |                     |           |                        |                                 |   |                        |                           |   |   |   |   |   |    |    |
| 6  | Prefer not to answer   |                                                                                                |                                                                                                                                                                                                                                                                                                                                                                                                                                                                                                              |   |                        |                       |             |                        |                                       |   |                        |                     |           |                        |                                 |   |                        |                           |   |   |   |   |   |    |    |

|    |                                                               |                                                     |                                                                                                                                                                                                                                                                                                                                                                                                                                                                                               |   |                          |   |                 |   |                    |   |                                             |   |              |   |                              |   |                                             |   |        |   |                      |
|----|---------------------------------------------------------------|-----------------------------------------------------|-----------------------------------------------------------------------------------------------------------------------------------------------------------------------------------------------------------------------------------------------------------------------------------------------------------------------------------------------------------------------------------------------------------------------------------------------------------------------------------------------|---|--------------------------|---|-----------------|---|--------------------|---|---------------------------------------------|---|--------------|---|------------------------------|---|---------------------------------------------|---|--------|---|----------------------|
| 73 | your_education                                                | Your highest level of education                     | <p>radio</p> <table border="1"> <tr><td>1</td><td>Middle school or less</td></tr> <tr><td>2</td><td>High School</td></tr> <tr><td>3</td><td>Under graduate</td></tr> <tr><td>4</td><td>Graduate</td></tr> <tr><td>5</td><td>Masters</td></tr> <tr><td>6</td><td>Doctorate</td></tr> <tr><td>7</td><td>Professional degree (MD, MBA, LAWYER etc..)</td></tr> <tr><td>8</td><td>Other</td></tr> <tr><td>9</td><td>Prefer not to answer</td></tr> </table> <p>Custom alignment: LV</p>           | 1 | Middle school or less    | 2 | High School     | 3 | Under graduate     | 4 | Graduate                                    | 5 | Masters      | 6 | Doctorate                    | 7 | Professional degree (MD, MBA, LAWYER etc..) | 8 | Other  | 9 | Prefer not to answer |
| 1  | Middle school or less                                         |                                                     |                                                                                                                                                                                                                                                                                                                                                                                                                                                                                               |   |                          |   |                 |   |                    |   |                                             |   |              |   |                              |   |                                             |   |        |   |                      |
| 2  | High School                                                   |                                                     |                                                                                                                                                                                                                                                                                                                                                                                                                                                                                               |   |                          |   |                 |   |                    |   |                                             |   |              |   |                              |   |                                             |   |        |   |                      |
| 3  | Under graduate                                                |                                                     |                                                                                                                                                                                                                                                                                                                                                                                                                                                                                               |   |                          |   |                 |   |                    |   |                                             |   |              |   |                              |   |                                             |   |        |   |                      |
| 4  | Graduate                                                      |                                                     |                                                                                                                                                                                                                                                                                                                                                                                                                                                                                               |   |                          |   |                 |   |                    |   |                                             |   |              |   |                              |   |                                             |   |        |   |                      |
| 5  | Masters                                                       |                                                     |                                                                                                                                                                                                                                                                                                                                                                                                                                                                                               |   |                          |   |                 |   |                    |   |                                             |   |              |   |                              |   |                                             |   |        |   |                      |
| 6  | Doctorate                                                     |                                                     |                                                                                                                                                                                                                                                                                                                                                                                                                                                                                               |   |                          |   |                 |   |                    |   |                                             |   |              |   |                              |   |                                             |   |        |   |                      |
| 7  | Professional degree (MD, MBA, LAWYER etc..)                   |                                                     |                                                                                                                                                                                                                                                                                                                                                                                                                                                                                               |   |                          |   |                 |   |                    |   |                                             |   |              |   |                              |   |                                             |   |        |   |                      |
| 8  | Other                                                         |                                                     |                                                                                                                                                                                                                                                                                                                                                                                                                                                                                               |   |                          |   |                 |   |                    |   |                                             |   |              |   |                              |   |                                             |   |        |   |                      |
| 9  | Prefer not to answer                                          |                                                     |                                                                                                                                                                                                                                                                                                                                                                                                                                                                                               |   |                          |   |                 |   |                    |   |                                             |   |              |   |                              |   |                                             |   |        |   |                      |
| 74 | your_race                                                     | You would like to identify yourself as              | <p>radio</p> <table border="1"> <tr><td>1</td><td>Black</td></tr> <tr><td>2</td><td>Hispanic/Latino</td></tr> <tr><td>3</td><td>White</td></tr> <tr><td>4</td><td>Asian (Chinese, Japanese, Korean, Filipino)</td></tr> <tr><td>5</td><td>Asian Indian</td></tr> <tr><td>6</td><td>Belongs to two or more races</td></tr> <tr><td>7</td><td>Middle Eastern</td></tr> <tr><td>8</td><td>Others</td></tr> <tr><td>9</td><td>Prefer not to answer</td></tr> </table> <p>Custom alignment: LV</p> | 1 | Black                    | 2 | Hispanic/Latino | 3 | White              | 4 | Asian (Chinese, Japanese, Korean, Filipino) | 5 | Asian Indian | 6 | Belongs to two or more races | 7 | Middle Eastern                              | 8 | Others | 9 | Prefer not to answer |
| 1  | Black                                                         |                                                     |                                                                                                                                                                                                                                                                                                                                                                                                                                                                                               |   |                          |   |                 |   |                    |   |                                             |   |              |   |                              |   |                                             |   |        |   |                      |
| 2  | Hispanic/Latino                                               |                                                     |                                                                                                                                                                                                                                                                                                                                                                                                                                                                                               |   |                          |   |                 |   |                    |   |                                             |   |              |   |                              |   |                                             |   |        |   |                      |
| 3  | White                                                         |                                                     |                                                                                                                                                                                                                                                                                                                                                                                                                                                                                               |   |                          |   |                 |   |                    |   |                                             |   |              |   |                              |   |                                             |   |        |   |                      |
| 4  | Asian (Chinese, Japanese, Korean, Filipino)                   |                                                     |                                                                                                                                                                                                                                                                                                                                                                                                                                                                                               |   |                          |   |                 |   |                    |   |                                             |   |              |   |                              |   |                                             |   |        |   |                      |
| 5  | Asian Indian                                                  |                                                     |                                                                                                                                                                                                                                                                                                                                                                                                                                                                                               |   |                          |   |                 |   |                    |   |                                             |   |              |   |                              |   |                                             |   |        |   |                      |
| 6  | Belongs to two or more races                                  |                                                     |                                                                                                                                                                                                                                                                                                                                                                                                                                                                                               |   |                          |   |                 |   |                    |   |                                             |   |              |   |                              |   |                                             |   |        |   |                      |
| 7  | Middle Eastern                                                |                                                     |                                                                                                                                                                                                                                                                                                                                                                                                                                                                                               |   |                          |   |                 |   |                    |   |                                             |   |              |   |                              |   |                                             |   |        |   |                      |
| 8  | Others                                                        |                                                     |                                                                                                                                                                                                                                                                                                                                                                                                                                                                                               |   |                          |   |                 |   |                    |   |                                             |   |              |   |                              |   |                                             |   |        |   |                      |
| 9  | Prefer not to answer                                          |                                                     |                                                                                                                                                                                                                                                                                                                                                                                                                                                                                               |   |                          |   |                 |   |                    |   |                                             |   |              |   |                              |   |                                             |   |        |   |                      |
| 75 | financial_status                                              | You consider the financial status of your family as | <p>radio</p> <table border="1"> <tr><td>1</td><td>Lower middle class/ poor</td></tr> <tr><td>2</td><td>Middle class</td></tr> <tr><td>3</td><td>Upper middle class</td></tr> <tr><td>4</td><td>Wealthy</td></tr> </table> <p>Custom alignment: LV</p>                                                                                                                                                                                                                                         | 1 | Lower middle class/ poor | 2 | Middle class    | 3 | Upper middle class | 4 | Wealthy                                     |   |              |   |                              |   |                                             |   |        |   |                      |
| 1  | Lower middle class/ poor                                      |                                                     |                                                                                                                                                                                                                                                                                                                                                                                                                                                                                               |   |                          |   |                 |   |                    |   |                                             |   |              |   |                              |   |                                             |   |        |   |                      |
| 2  | Middle class                                                  |                                                     |                                                                                                                                                                                                                                                                                                                                                                                                                                                                                               |   |                          |   |                 |   |                    |   |                                             |   |              |   |                              |   |                                             |   |        |   |                      |
| 3  | Upper middle class                                            |                                                     |                                                                                                                                                                                                                                                                                                                                                                                                                                                                                               |   |                          |   |                 |   |                    |   |                                             |   |              |   |                              |   |                                             |   |        |   |                      |
| 4  | Wealthy                                                       |                                                     |                                                                                                                                                                                                                                                                                                                                                                                                                                                                                               |   |                          |   |                 |   |                    |   |                                             |   |              |   |                              |   |                                             |   |        |   |                      |
| 76 | country                                                       | Do you live in the USA?                             | <p>yesno</p> <table border="1"> <tr><td>1</td><td>Yes</td></tr> <tr><td>0</td><td>No</td></tr> </table>                                                                                                                                                                                                                                                                                                                                                                                       | 1 | Yes                      | 0 | No              |   |                    |   |                                             |   |              |   |                              |   |                                             |   |        |   |                      |
| 1  | Yes                                                           |                                                     |                                                                                                                                                                                                                                                                                                                                                                                                                                                                                               |   |                          |   |                 |   |                    |   |                                             |   |              |   |                              |   |                                             |   |        |   |                      |
| 0  | No                                                            |                                                     |                                                                                                                                                                                                                                                                                                                                                                                                                                                                                               |   |                          |   |                 |   |                    |   |                                             |   |              |   |                              |   |                                             |   |        |   |                      |
| 77 | country_not_usa<br>Show the field ONLY if:<br>[country] = '0' | Name of your country                                | text                                                                                                                                                                                                                                                                                                                                                                                                                                                                                          |   |                          |   |                 |   |                    |   |                                             |   |              |   |                              |   |                                             |   |        |   |                      |
| 78 | state_usa<br>Show the field ONLY if:<br>[country] = '1'       | Name of your State                                  | text                                                                                                                                                                                                                                                                                                                                                                                                                                                                                          |   |                          |   |                 |   |                    |   |                                             |   |              |   |                              |   |                                             |   |        |   |                      |
| 79 | treatment_of_covid19_complete                                 | Section Header: <i>Form Status</i><br>Complete?     | <p>dropdown</p> <table border="1"> <tr><td>0</td><td>Incomplete</td></tr> <tr><td>1</td><td>Unverified</td></tr> <tr><td>2</td><td>Complete</td></tr> </table>                                                                                                                                                                                                                                                                                                                                | 0 | Incomplete               | 1 | Unverified      | 2 | Complete           |   |                                             |   |              |   |                              |   |                                             |   |        |   |                      |
| 0  | Incomplete                                                    |                                                     |                                                                                                                                                                                                                                                                                                                                                                                                                                                                                               |   |                          |   |                 |   |                    |   |                                             |   |              |   |                              |   |                                             |   |        |   |                      |
| 1  | Unverified                                                    |                                                     |                                                                                                                                                                                                                                                                                                                                                                                                                                                                                               |   |                          |   |                 |   |                    |   |                                             |   |              |   |                              |   |                                             |   |        |   |                      |
| 2  | Complete                                                      |                                                     |                                                                                                                                                                                                                                                                                                                                                                                                                                                                                               |   |                          |   |                 |   |                    |   |                                             |   |              |   |                              |   |                                             |   |        |   |                      |
